# Supplementary material for: Methods for determining optimal positive end-expiratory pressure in patients undergoing invasive mechanical ventilation: a scoping review
Source: PubMed Central journal article supplement — Can J Anaesth. 2024 Nov 20;71(11):1535–55. doi: 10.1007/s12630-024-02871-6 (PMC11602853; doi:10.1007/s12630-024-02871-6), 2024-11-20
Supplement: 12630_2024_2871_MOESM1_ESM.pdf [file 12630_2024_2871_MOESM1_ESM.pdf]

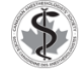

## ELECTRONIC SUPPLEMENTARY MATERIAL

### **Edginton S *et al.*: Methods for determining optimal positive end-expiratory pressure in patients undergoing invasive mechanical ventilation: a scoping review**

*Disclaimer: Electronic Supplementary Material (ESM) is supplied by the authors for the benefit of readers. This feature is intended to provide additional information, context, and/or dimension to complement articles. Readers should be aware that unlike the main print manuscript, ESM may not undergo extensive peer review and typically is posted as supplied by the authors without editing, proofreading, accuracy checking, copyediting, or typesetting; it is published online only.*

#### TABLE OF CONTENTS

|                  |                                                                                                      |
|------------------|------------------------------------------------------------------------------------------------------|
| <b>eAppendix</b> | PRISMA-ScR checklist                                                                                 |
| <b>eTable 1</b>  | MEDLINE search strategy                                                                              |
| <b>eTable 2</b>  | Embase search strategy                                                                               |
| <b>eTable 3</b>  | CENTRAL search strategy                                                                              |
| <b>eTable 4</b>  | Scopus search strategy                                                                               |
| <b>eTable 5</b>  | Web of Science search strategy                                                                       |
| <b>eTable 6</b>  | Details of included studies                                                                          |
| <b>eTable 7</b>  | Specific modalities of imaging-based methods of determining optimal positive end-expiratory pressure |
| <b>eTable 8</b>  | Publishing journals of randomized controlled trials                                                  |
| <b>eTable 9</b>  | Countries participating in randomized controlled trials                                              |
| <b>eTable 10</b> | Number of randomized controlled trials with significant differences in primary endpoint              |
| <b>eTable 11</b> | Clinical outcomes from randomized controlled trials                                                  |
| <b>eTable 12</b> | List of citations that could not be translated or retrieved                                          |

- eFig. 1** Articles studying methods of determining optimal positive end-expiratory pressure published by five-year interval
- eFig. 2** Number of studies assessing methods of determining optimal positive end-expiratory pressure published by five-year time period
- eFig. 3** Number of participants in randomized controlled trials assessing methods of determining optimal positive end-expiratory pressure

eAppendix PRISMA-ScR checklist

**Preferred Reporting Items for Systematic reviews and Meta-Analyses extension for Scoping Reviews (PRISMA-ScR) Checklist**

| SECTION                                               | ITEM | PRISMA-ScR CHECKLIST ITEM                                                                                                                                                                                                                                                                                  | REPORTED ON PAGE # |
|-------------------------------------------------------|------|------------------------------------------------------------------------------------------------------------------------------------------------------------------------------------------------------------------------------------------------------------------------------------------------------------|--------------------|
| <b>TITLE</b>                                          |      |                                                                                                                                                                                                                                                                                                            |                    |
| Title                                                 | 1    | Identify the report as a scoping review.                                                                                                                                                                                                                                                                   | 1                  |
| <b>ABSTRACT</b>                                       |      |                                                                                                                                                                                                                                                                                                            |                    |
| Structured summary                                    | 2    | Provide a structured summary that includes (as applicable): background, objectives, eligibility criteria, sources of evidence, charting methods, results, and conclusions that relate to the review questions and objectives.                                                                              | 2                  |
| <b>INTRODUCTION</b>                                   |      |                                                                                                                                                                                                                                                                                                            |                    |
| Rationale                                             | 3    | Describe the rationale for the review in the context of what is already known. Explain why the review questions/objectives lend themselves to a scoping review approach.                                                                                                                                   | 4                  |
| Objectives                                            | 4    | Provide an explicit statement of the questions and objectives being addressed with reference to their key elements (e.g., population or participants, concepts, and context) or other relevant key elements used to conceptualize the review questions and/or objectives.                                  | 4                  |
| <b>METHODS</b>                                        |      |                                                                                                                                                                                                                                                                                                            |                    |
| Protocol and registration                             | 5    | Indicate whether a review protocol exists; state if and where it can be accessed (e.g., a Web address); and if available, provide registration information, including the registration number.                                                                                                             | 6                  |
| Eligibility criteria                                  | 6    | Specify characteristics of the sources of evidence used as eligibility criteria (e.g., years considered, language, and publication status), and provide a rationale.                                                                                                                                       | 6                  |
| Information sources*                                  | 7    | Describe all information sources in the search (e.g., databases with dates of coverage and contact with authors to identify additional sources), as well as the date the most recent search was executed.                                                                                                  | 6-7                |
| Search                                                | 8    | Present the full electronic search strategy for at least 1 database, including any limits used, such that it could be repeated.                                                                                                                                                                            | Supplement         |
| Selection of sources of evidence†                     | 9    | State the process for selecting sources of evidence (i.e., screening and eligibility) included in the scoping review.                                                                                                                                                                                      | 7                  |
| Data charting process‡                                | 10   | Describe the methods of charting data from the included sources of evidence (e.g., calibrated forms or forms that have been tested by the team before their use, and whether data charting was done independently or in duplicate) and any processes for obtaining and confirming data from investigators. | 7                  |
| Data items                                            | 11   | List and define all variables for which data were sought and any assumptions and simplifications made.                                                                                                                                                                                                     | 7                  |
| Critical appraisal of individual sources of evidence§ | 12   | If done, provide a rationale for conducting a critical appraisal of included sources of evidence; describe the methods used and how this information was used in any data synthesis (if appropriate).                                                                                                      | 8                  |

| SECTION                                       | ITEM | PRISMA-ScR CHECKLIST ITEM                                                                                                                                                                       | REPORTED ON PAGE #      |
|-----------------------------------------------|------|-------------------------------------------------------------------------------------------------------------------------------------------------------------------------------------------------|-------------------------|
| Synthesis of results                          | 13   | Describe the methods of handling and summarizing the data that were charted.                                                                                                                    | 8                       |
| <b>RESULTS</b>                                |      |                                                                                                                                                                                                 |                         |
| Selection of sources of evidence              | 14   | Give numbers of sources of evidence screened, assessed for eligibility, and included in the review, with reasons for exclusions at each stage, ideally using a flow diagram.                    | Fig 1                   |
| Characteristics of sources of evidence        | 15   | For each source of evidence, present characteristics for which data were charted and provide the citations.                                                                                     | Appendix                |
| Critical appraisal within sources of evidence | 16   | If done, present data on critical appraisal of included sources of evidence (see item 12).                                                                                                      | Tables 1-4              |
| Results of individual sources of evidence     | 17   | For each included source of evidence, present the relevant data that were charted that relate to the review questions and objectives.                                                           | Tables 1-4 and Appendix |
| Synthesis of results                          | 18   | Summarize and/or present the charting results as they relate to the review questions and objectives.                                                                                            | 9-12                    |
| <b>DISCUSSION</b>                             |      |                                                                                                                                                                                                 |                         |
| Summary of evidence                           | 19   | Summarize the main results (including an overview of concepts, themes, and types of evidence available), link to the review questions and objectives, and consider the relevance to key groups. | 13-15                   |
| Limitations                                   | 20   | Discuss the limitations of the scoping review process.                                                                                                                                          | 16                      |
| Conclusions                                   | 21   | Provide a general interpretation of the results with respect to the review questions and objectives, as well as potential implications and/or next steps.                                       | 16                      |
| <b>FUNDING</b>                                |      |                                                                                                                                                                                                 |                         |
| Funding                                       | 22   | Describe sources of funding for the included sources of evidence, as well as sources of funding for the scoping review. Describe the role of the funders of the scoping review.                 | 17                      |

JBIG = Joanna Briggs Institute; PRISMA-ScR = Preferred Reporting Items for Systematic reviews and Meta-Analyses extension for Scoping Reviews.

\* Where *sources of evidence* (see second footnote) are compiled from, such as bibliographic databases, social media platforms, and Web sites.

† A more inclusive/heterogeneous term used to account for the different types of evidence or data sources (e.g., quantitative and/or qualitative research, expert opinion, and policy documents) that may be eligible in a scoping review as opposed to only studies. This is not to be confused with *information sources* (see first footnote).

‡ The frameworks by Arksey and O'Malley (6) and Levac and colleagues (7) and the JBI guidance (4, 5) refer to the process of data extraction in a scoping review as data charting.

§ The process of systematically examining research evidence to assess its validity, results, and relevance before using it to inform a decision. This term is used for items 12 and 19 instead of "risk of bias" (which is more applicable to systematic reviews of interventions) to include and acknowledge the various sources of evidence that may be used in a scoping review (e.g., quantitative and/or qualitative research, expert opinion, and policy document).

From: Tricco AC, Lillie E, Zarin W, O'Brien KK, Colquhoun H, Levac D, et al. PRISMA Extension for Scoping Reviews (PRISMA-ScR): Checklist and Explanation. *Ann Intern Med.* 2018;169:467–473. doi: [10.7326/M18-0850](https://doi.org/10.7326/M18-0850).

**eTable 1** MEDLINE search strategy

| #  | Query                                                                                                                                                                                                                                  |
|----|----------------------------------------------------------------------------------------------------------------------------------------------------------------------------------------------------------------------------------------|
| 1  | end-expiratory pressure*.tw,kf,sh.                                                                                                                                                                                                     |
| 2  | (positive adj5 expiratory pressure*).tw,kf,sh.                                                                                                                                                                                         |
| 3  | (positive adj2 endexpiratory pressure*).tw,kf,sh.                                                                                                                                                                                      |
| 4  | PEEP*.tw,kf.                                                                                                                                                                                                                           |
| 5  | (open lung adj3 (ventilat* or strateg* or approach*).tw,kf.                                                                                                                                                                            |
| 6  | or/1-5                                                                                                                                                                                                                                 |
| 7  | Respiratory Mechanics/                                                                                                                                                                                                                 |
| 8  | ((high* or low* or optim* or individual* or increment* or decrement*) adj5 (strateg* or applic* or approach* or level* or trial* or titrat*).tw,kf.                                                                                    |
| 9  | ((curve or curves or pressure or pressures) adj5 (driv* or stress* or PEEP* or oxygenat* or esophag*).tw,kf,sh.                                                                                                                        |
| 10 | ((oxygenation or ventilation) adj3 (index or indexes or indices)).tw,kf.                                                                                                                                                               |
| 11 | ventilatory parameter*.tw,kf.                                                                                                                                                                                                          |
| 12 | ((high* or low* or optim* or individual* or increment* or decrement* or restricted or liberal or algorithm* or level or levels or chang*) adj3 (PEEP* or positive end expiratory pressure* or positive endexpiratory pressure*).tw,kf. |
| 13 | or/7-12                                                                                                                                                                                                                                |
| 14 | exp Respiration, Artificial/ or Ventilators, Mechanical/                                                                                                                                                                               |
| 15 | ((artificial* or mechanical*) adj3 (ventilat* or respirat*).tw,kf.                                                                                                                                                                     |
| 16 | Intubation, Intratracheal/                                                                                                                                                                                                             |
| 17 | (IMV or intubat*).tw,kf.                                                                                                                                                                                                               |
| 18 | or/14-17                                                                                                                                                                                                                               |
| 19 | 6 and 13 and 18                                                                                                                                                                                                                        |
| 20 | exp Child/ not (exp Adult/ and exp Child/)                                                                                                                                                                                             |
| 21 | exp Infant/ not (exp Adult/ and exp Infant/)                                                                                                                                                                                           |
| 22 | exp Animals/ not (exp Animals/ and Humans/)                                                                                                                                                                                            |
| 23 | or/20-22                                                                                                                                                                                                                               |
| 24 | 19 not 23                                                                                                                                                                                                                              |

**eTable 2** Embase search strategy

| #  | Query                                                                                                                                                                                                                                   |
|----|-----------------------------------------------------------------------------------------------------------------------------------------------------------------------------------------------------------------------------------------|
| 1  | positive end expiratory pressure ventilation/                                                                                                                                                                                           |
| 2  | end-expiratory pressure*.tw,kf.                                                                                                                                                                                                         |
| 3  | (positive adj5 end expiratory pressure*).tw,kf.                                                                                                                                                                                         |
| 4  | (positive adj2 endexpiratory pressure*).tw,kf.                                                                                                                                                                                          |
| 5  | PEEP*.tw,kf.                                                                                                                                                                                                                            |
| 6  | open lung ventilation/                                                                                                                                                                                                                  |
| 7  | (open lung adj3 (ventilat* or strateg* or approach*)).tw,kf.                                                                                                                                                                            |
| 8  | or/1-7                                                                                                                                                                                                                                  |
| 9  | breathing mechanics/                                                                                                                                                                                                                    |
| 10 | ((high* or low* or optim* or individual* or increment* or decrement*) adj5 (strateg* or applic* or approach* or trial* or titrat* or level*)).tw,kf.                                                                                    |
| 11 | ((curve or curves or pressure or pressures) adj5 (driv* or stress* or PEEP* or oxygenat* or esophag*)).tw,kf.                                                                                                                           |
| 12 | ((oxygenation or ventilation) adj3 (index or indexes or indices)).tw,kf.                                                                                                                                                                |
| 13 | ventilatory parameter*.tw,kf.                                                                                                                                                                                                           |
| 14 | ((high* or low* or optim* or individual* or increment* or decrement* or restricted or liberal or algorithm* or level or levels or chang*) adj3 (PEEP* or positive end expiratory pressure* or positive endexpiratory pressure*)).tw,kf. |
| 15 | or/9-14                                                                                                                                                                                                                                 |
| 16 | exp artificial ventilation/ or mechanical ventilator/                                                                                                                                                                                   |
| 17 | ((artificial* or mechanical*) adj3 (ventilat* or respirat*)).tw,kf.                                                                                                                                                                     |
| 18 | endotracheal intubation/                                                                                                                                                                                                                |
| 19 | (IMV or intubat*).tw,kf.                                                                                                                                                                                                                |
| 20 | or/16-19                                                                                                                                                                                                                                |
| 21 | 8 and 15 and 20                                                                                                                                                                                                                         |
| 22 | exp child/ not ((exp adult/ or exp aged/) and exp child/)                                                                                                                                                                               |
| 23 | exp infant/ not ((exp adult/ or exp aged/) and exp infant/)                                                                                                                                                                             |
| 24 | exp animals/ not (exp animals/ and humans/)                                                                                                                                                                                             |
| 25 | 22 or 23 or 24                                                                                                                                                                                                                          |
| 26 | 21 not 25                                                                                                                                                                                                                               |

**eTable 3** CENTRAL search strategy

| #  | Query                                                                                                                                                                                   |
|----|-----------------------------------------------------------------------------------------------------------------------------------------------------------------------------------------|
| 1  | end-expiratory pressure*.tw,hw,sh.                                                                                                                                                      |
| 2  | (positive adj5 end expiratory pressure*).tw,hw,sh.                                                                                                                                      |
| 3  | (positive adj2 endexpiratory pressure*).tw,hw,sh.                                                                                                                                       |
| 4  | (open lung adj3 (ventilat* or strateg* or approach*).tw,hw,sh.                                                                                                                          |
| 5  | PEEP*.tw,hw,sh.                                                                                                                                                                         |
| 6  | (open lung adj3 (ventilat* or strateg* or approach*).tw,hw,sh.                                                                                                                          |
| 7  | or/2-6                                                                                                                                                                                  |
| 8  | respiratory mechanics.tw,hw,sh.                                                                                                                                                         |
| 9  | ((high* or low* optim* or best or individual* or increment* or decrement* or open lung) adj5 (strateg* or applic* or approach* or setting* or trial* or titrat* or level*).tw,hw,sh.    |
| 10 | ((curve or curves or pressure or pressures) adj5 (driv* or stress* or PEEP* or oxygenat* or esophag*).tw,hw,sh.                                                                         |
| 11 | ((oxygenation or ventilation) adj3 (index or indexes or indices)).tw,hw,sh.                                                                                                             |
| 12 | ventilatory parameter*.tw,hw,sh.                                                                                                                                                        |
| 13 | ((high* or low* optim* or best or individual* or increment* or decrement* or open lung) adj3 (PEEP* or positive end expiratory pressure* or positive endexpiratory pressure*).tw,hw,sh. |
| 14 | or/8-13                                                                                                                                                                                 |
| 15 | ((artificial* or mechanical*) adj3 (ventilat* or respirat*).tw,hw,sh.                                                                                                                   |
| 16 | (IMV or intubat*).tw,hw,sh.                                                                                                                                                             |
| 17 | 15 or 16                                                                                                                                                                                |
| 18 | 7 and 14 and 17                                                                                                                                                                         |
| 19 | exp child/ not (exp adult/ and exp child/)                                                                                                                                              |
| 20 | exp infant/ not (exp adult/ and exp infant/)                                                                                                                                            |
| 21 | exp animals/ not (exp animals/ and humans/)                                                                                                                                             |
| 22 | or/19-21                                                                                                                                                                                |
| 23 | 18 not 22                                                                                                                                                                               |

CENTRAL = Cochrane Central Register of Controlled Trials

**eTable 4** Scopus search strategy

```
(TITLE-ABS-KEY (end-expiratory-pressure* OR (positive W/5 expiratory-
pressure*) OR (positive W/2 endexpiratory-pressure*) OR peep* OR (open-
lung W/3 (ventilat* OR strateg* OR approach*)))) AND ((TITLE-ABS-
KEY (respiratory-mechanics OR ventilatory-parameter*) OR TITLE-ABS-
KEY (((high* OR low* OR optim* OR individual* OR increment* OR decrement*)
W/5 (strateg* OR applic* OR approach* OR level* OR trial* OR titrat*))) OR TITL
E-ABS-
KEY (((curve OR curves OR pressure OR pressures) W/5 (driv* OR stress* OR pee
p* OR oxygenat* OR esophag*)) .) OR TITLE-ABS-
KEY (((oxygenation OR ventilation) W/3 (index OR indexes OR indices))) OR TIT
LE-ABS-
KEY (((high* OR low* OR optim* OR individual* OR increment* OR decrement* O
R restricted OR liberal OR algorithm* OR level OR levels OR chang*) W/3 (peep* O
R positive-end-expiratory-pressure* OR positive-endexpiratory-
pressure*)))) AND ((TITLE-ABS-
KEY (((artificial* OR mechanical*) W/3 (ventilat* OR respirat*))) OR TITLE-ABS-
KEY ((imv OR intubat*)))) AND (EXCLUDE (SRCTYPE, "k") OR EXCLUDE (S
RCTYPE, "Undefined")) AND (LIMIT-TO (DOCTYPE, "ar") OR LIMIT-
TO (DOCTYPE, "re") OR LIMIT-TO (DOCTYPE, "cp")) AND (LIMIT-
TO (SUBJAREA, "MEDI") OR EXCLUDE (SUBJAREA, "AGRI") OR EXCLUDE (
SUBJAREA, "ARTS") OR EXCLUDE (SUBJAREA, "CENG") OR EXCLUDE (SUBJ
AREA, "CHEM") OR EXCLUDE (SUBJAREA, "COMP") OR EXCLUDE (SUBJAR
EA, "DECI") OR EXCLUDE (SUBJAREA, "DENT") OR EXCLUDE (SUBJAREA,
"EART") OR EXCLUDE (SUBJAREA, "ENGI") OR EXCLUDE (SUBJAREA, "IMM
U") OR EXCLUDE (SUBJAREA, "SOCI") OR EXCLUDE (SUBJAREA, "PSYC") O
R EXCLUDE (SUBJAREA, "ENVI") OR EXCLUDE (SUBJAREA, "VETE") OR EX
CLUDE (SUBJAREA, "MATE") OR EXCLUDE (SUBJAREA, "PHYS"))
```



**eTable 5** Web of Science search strategy

|                                                                                                                                                                                                                                                                                                                                                                                                                                                                                                                                                                                                                                              |
|----------------------------------------------------------------------------------------------------------------------------------------------------------------------------------------------------------------------------------------------------------------------------------------------------------------------------------------------------------------------------------------------------------------------------------------------------------------------------------------------------------------------------------------------------------------------------------------------------------------------------------------------|
| <p><b>1.</b> end-expiratory pressure* OR (positive NEAR/5 expiratory pressure*) OR (positive NEAR/2 endexpiratory pressure*) OR PEEP* OR (open lung NEAR/3 (ventilat* or strateg* or approach*)) (Topic)</p>                                                                                                                                                                                                                                                                                                                                                                                                                                 |
| <p><b>2.</b> TS=(((high* or low* or optim* or individual* or increment* or decrement*) NEAR/5 (strateg* or applic* or approach* or level* or trial* or titrat*))) OR TS=(((curve or curves or pressure or pressures) NEAR/5 (driv* or stress* or PEEP* or oxygenat* or esophag*))) OR TS=(((oxygenation or ventilation) NEAR/3 (index or indexes or indices))) OR TS=(ventilatory-parameter*) OR TS=(((high* or low* or optim* or individual* or increment* or decrement* or restricted or liberal or algorithm* or level or levels or chang*) NEAR/3 (PEEP* or positive-end-expiratory-pressure* or positive-endexpiratory-pressure*)))</p> |
| <p><b>3.</b> ((artificial* or mechanical*) NEAR/3 (ventilat* or respirat*)) (Topic) or (IMV or intubat*) (Topic)</p>                                                                                                                                                                                                                                                                                                                                                                                                                                                                                                                         |
| <p><b>4.</b> #1 AND #2 AND #3</p>                                                                                                                                                                                                                                                                                                                                                                                                                                                                                                                                                                                                            |

**eTable 6** Details of included studies

| Author                           | Year              | Sample size ( <i>n</i> ) | Setting | Study design        | Population               | PEEP method(s)                                                                              | Primary outcome (if RCT)                       |
|----------------------------------|-------------------|--------------------------|---------|---------------------|--------------------------|---------------------------------------------------------------------------------------------|------------------------------------------------|
| Abu-Khabar <sup>1</sup>          | 2011              | 20                       | ICU     | Observational       | ARDS                     | Dead space                                                                                  | N/A                                            |
| Abutbul <sup>2</sup>             | 2014              | 20                       | ICU     | Observational       | Mixed                    | Computer-based                                                                              | N/A                                            |
| Acar Cinleti <sup>3</sup>        | 2019 <sup>a</sup> | 11                       | ICU     | Observational       | Obese                    | Esophageal probe                                                                            | N/A                                            |
| Al Masry <sup>4</sup>            | 2012              | 60                       | ICU     | RCT                 | ARDS                     | High PEEP-F <sub>I</sub> O <sub>2</sub> table, oxygenation                                  | Physiologic measures                           |
| Albaiceta <sup>5</sup>           | 2005              | 8                        | ICU     | Observational       | ARDS                     | PV curves                                                                                   | N/A                                            |
| Algera <sup>6</sup>              | 2020              | 980                      | ICU     | RCT                 | Mixed                    | Oxygenation                                                                                 | VFD at 28 days                                 |
| Amato <sup>7</sup>               | 1998              | 53                       | ICU     | RCT                 | ARDS                     | PV curves                                                                                   | 28-day mortality                               |
| Anderson <sup>8</sup>            | 2002              | 2                        | ICU     | Observational       | ARDS                     | Computer-based                                                                              | N/A                                            |
| Antonin <sup>9</sup>             | 2022 <sup>a</sup> | 20                       | ICU     | Crossover           | ARDS, COVID-19           | EIT, plateau pressure                                                                       | N/A                                            |
| Arellano <sup>10</sup>           | 2019 <sup>a</sup> | 10                       | ICU     | Observational       | ARDS                     | EIT                                                                                         | N/A                                            |
| Arellano <sup>11</sup>           | 2019 <sup>a</sup> | 11                       | ICU     | Observational       | ARDS                     | EIT                                                                                         | N/A                                            |
| Arnal <sup>12</sup>              | 2012              | 50                       | ICU     | Crossover           | Mixed                    | Computer-based                                                                              | N/A                                            |
| Arnal <sup>13</sup>              | 2013              | 100                      | ICU     | Observational       | ARDS, COPD, mixed        | Computer-based                                                                              | N/A                                            |
| Arnal <sup>14</sup>              | 2019              | 255                      | ICU     | Observational       | Mixed                    | Computer-based                                                                              | N/A                                            |
| Asar <sup>15</sup>               | 2021              | 106                      | OR      | Nonrandomized trial | Obese, OR                | Compliance                                                                                  | N/A                                            |
| Badet <sup>16</sup>              | 2009              | 12                       | ICU     | Observational       | ARDS                     | Oxygenation                                                                                 | N/A                                            |
| Baedorf Kassis <sup>17</sup>     | 2016              | 56                       | ICU     | Observational       | ARDS                     | Esophageal balloon                                                                          | N/A                                            |
| Bagheri Moghaddam <sup>18</sup>  | 2018 <sup>a</sup> | 15                       | ICU     | Observational       | ARDS                     | Low PEEP-F <sub>I</sub> O <sub>2</sub> table, Plateau pressure                              | N/A                                            |
| Becher <sup>19</sup>             | 2015              | 9                        | ICU     | Observational       | ARDS                     | PV curves                                                                                   | N/A                                            |
| Becher <sup>20</sup>             | 2021              | 20                       | ICU     | Observational       | ARDS                     | EIT, low PEEP-F <sub>I</sub> O <sub>2</sub> table                                           | N/A                                            |
| Beitler <sup>21</sup>            | 2019              | 200                      | ICU     | RCT                 | ARDS                     | Esophageal balloon, high PEEP-F <sub>I</sub> O <sub>2</sub> table                           | Composite: 28-day mortality and VFD at 28 days |
| Berg <sup>22</sup>               | 2021 <sup>a</sup> | 21                       | ICU     | Observational       | Mixed                    | Esophageal balloon                                                                          | N/A                                            |
| Bergamini <sup>23</sup>          | 2010 <sup>a</sup> | 6                        | ICU     | Observational       | ARDS                     | Compliance, oxygenation                                                                     | N/A                                            |
| Bergez <sup>24</sup>             | 2019              | 19                       | ICU     | Crossover           | ARDS                     | Esophageal balloon, plateau pressure                                                        | N/A                                            |
| Bersten <sup>25</sup>            | 1998              | 10                       | ICU     | Observational       | ARDS                     | EELV                                                                                        | N/A                                            |
| Bime <sup>26</sup>               | 2016              | 505 <sup>b</sup>         | ICU     | Reanalysis          | ARDS, obese              | High PEEP-F <sub>I</sub> O <sub>2</sub> table, low PEEP-F <sub>I</sub> O <sub>2</sub> table | N/A                                            |
| Bito <sup>27</sup>               | 2022              | 35                       | ICU     | Nonrandomized trial | Postoperative            | EIT                                                                                         | N/A                                            |
| Blanch <sup>28</sup>             | 1987              | 13                       | ICU     | Observational       | AHRF                     | PV curves                                                                                   | N/A                                            |
| Blankman <sup>29</sup>           | 2016              | 15                       | ICU     | Observational       | Postoperative            | Dead space, EIT                                                                             | N/A                                            |
| Blecha <sup>30</sup>             | 2023              | 98                       | OR      | RCT                 | Laparoscopic, normal, OR | Compliance                                                                                  | Spirometric measures                           |
| Boesing <sup>31</sup>            | 2022              | 40                       | ICU     | Observational       | ARDS, prone              | Compliance, esophageal balloon, low PEEP-F <sub>I</sub> O <sub>2</sub> table                | N/A                                            |
| Brault <sup>32</sup>             | 2021              | 27                       | ICU     | Observational       | ARDS, COVID-19           | Airway opening pressure                                                                     | N/A                                            |
| Bronco <sup>33</sup>             | 2021              | 41                       | ICU     | Observational       | Mixed                    | EIT                                                                                         | N/A                                            |
| Brower <sup>34</sup>             | 2004              | 549                      | ICU     | RCT                 | ARDS                     | High PEEP-F <sub>I</sub> O <sub>2</sub> table, low PEEP-F <sub>I</sub> O <sub>2</sub> table | Hospital mortality                             |
| Buiteman-Kruizinga <sup>35</sup> | 2021              | 51                       | ICU     | Observational       | ARDS, COPD               | Computer-based                                                                              | N/A                                            |
| Buiteman-Kruizinga <sup>36</sup> | 2022 <sup>a</sup> | 18                       | ICU     | Crossover           | Mixed                    | Computer-based                                                                              | N/A                                            |

|                                    |                   |       |     |               |                          |                                                                                                   |                                       |
|------------------------------------|-------------------|-------|-----|---------------|--------------------------|---------------------------------------------------------------------------------------------------|---------------------------------------|
| Cammarota <sup>37</sup>            | 2020              | 28    | OR  | RCT           | Laparoscopic, normal, OR | Esophageal balloon, oxygenation                                                                   | Physiologic measures                  |
| Carroll <sup>38</sup>              | 1988              | 108   | ICU | RCT           | Postoperative            | Oxygenation, shunt                                                                                | ICU mortality                         |
| Carvalho <sup>39</sup>             | 1997              | 48    | ICU | RCT           | ARDS                     | PV curves                                                                                         | Physiologic measures                  |
| Casserly <sup>40</sup>             | 2015              | 9     | ICU | Observational | ARDS                     | Compliance, EELV, oxygenation                                                                     | N/A                                   |
| Cavalcanti <sup>41</sup>           | 2017              | 1,010 | ICU | RCT           | ARDS                     | Compliance, low PEEP-F <sub>i</sub> O <sub>2</sub> table                                          | 28-day mortality                      |
| Ceruti <sup>42</sup>               | 2021              | 79    | ICU | Observational | ARDS, COVID-19           | Weight                                                                                            | N/A                                   |
| Chiew <sup>43</sup>                | 2011              | 10    | ICU | Observational | ARDS                     | Compliance                                                                                        | N/A                                   |
| Chiew <sup>44</sup>                | 2015              | 10    | ICU | Observational | ARDS                     | Compliance                                                                                        | N/A                                   |
| Chimot <sup>45</sup>               | 2017              | 12    | ICU | Observational | ARDS                     | Oxygen delivery                                                                                   | N/A                                   |
| Chiumello <sup>46</sup>            | 2014              | 51    | ICU | Crossover     | ARDS                     | Esophageal balloon, high PEEP-F <sub>i</sub> O <sub>2</sub> table, plateau pressure, stress index | N/A                                   |
| Chiumello <sup>47</sup>            | 2021              | 61    | ICU | Observational | ARDS, COVID-19           | High PEEP-F <sub>i</sub> O <sub>2</sub> table                                                     | N/A                                   |
| Cinnella <sup>48</sup>             | 2015              | 15    | ICU | Observational | ARDS                     | Compliance, low PEEP-F <sub>i</sub> O <sub>2</sub> table                                          | N/A                                   |
| Cole <sup>49</sup>                 | 1984              | 10    | ICU | Observational | Mixed                    | EELV                                                                                              | N/A                                   |
| Constantin <sup>50</sup>           | 2019              | 420   | ICU | RCT           | ARDS                     | Low PEEP-F <sub>i</sub> O <sub>2</sub> table, plateau pressure                                    | 90-day mortality                      |
| Cylwik <sup>51</sup>               | 2021              | 100   | OR  | Observational | Normal, OR               | Ultrasound                                                                                        | N/A                                   |
| D'Antini <sup>52</sup>             | 2017              | 20    | OR  | Observational | Laparoscopic, normal, OR | Compliance                                                                                        | N/A                                   |
| da Cruz <sup>53</sup>              | 2023              | 184   | ICU | Observational | ARDS, COVID-19           | Driving pressure, low PEEP-F <sub>i</sub> O <sub>2</sub> table                                    | N/A                                   |
| Damien <sup>54</sup>               | 2018 <sup>a</sup> | 8     | ICU | Observational | ARDS, obese              | Esophageal balloon                                                                                | N/A                                   |
| Dara <sup>55</sup>                 | 2022 <sup>a</sup> | 20    | ICU | Crossover     | ARDS                     | Esophageal balloon                                                                                | N/A                                   |
| Dargvainis <sup>56</sup>           | 2022              | 30    | OR  | Observational | Laparoscopic, normal, OR | EIT                                                                                               | N/A                                   |
| de Matos <sup>57</sup>             | 2012              | 51    | ICU | Observational | ARDS                     | CT                                                                                                | N/A                                   |
| De Santis Santiago <sup>58</sup>   | 2021              | 21    | ICU | Observational | ARDS                     | Compliance, low PEEP-F <sub>i</sub> O <sub>2</sub> table                                          | N/A                                   |
| Depta <sup>59</sup>                | 2022              | 16    | ICU | Observational | ARDS, COVID-19           | Time constant                                                                                     | N/A                                   |
| Depta <sup>60</sup>                | 2022              | 60    | ICU | Observational | ARDS, COVID-19           | Computer-based                                                                                    | N/A                                   |
| Di Pierro <sup>61</sup>            | 2022              | 24    | ICU | Observational | ARDS, COVID-19, ECMO     | EIT                                                                                               | N/A                                   |
| Dianti <sup>62</sup>               | 2022              | 30    | ICU | Observational | AHRF, ECMO               | Compliance                                                                                        | N/A                                   |
| Douglas <sup>63</sup>              | 1977              | 54    | ICU | Observational | ARDS                     | Shunt                                                                                             | N/A                                   |
| Dyhr <sup>64</sup>                 | 2002              | 16    | ICU | RCT           | Postoperative            | PV curves                                                                                         | Physiologic measures                  |
| Eichler <sup>65</sup>              | 2018              | 37    | OR  | Observational | Obese, OR                | Esophageal balloon                                                                                | N/A                                   |
| Elshazly <sup>66</sup>             | 2021              | 40    | OR  | RCT           | Laparoscopic, obese, OR  | Ultrasound                                                                                        | Physiologic measures                  |
| Erlandsson <sup>67</sup>           | 2006              | 15    | OR  | Observational | Obese, OR                | EIT                                                                                               | N/A                                   |
| Ernest <sup>68</sup>               | 2022 <sup>a</sup> | 168   | OR  | RCT           | Normal, OR               | Driving pressure                                                                                  | Postoperative pulmonary complications |
| Eronia <sup>69</sup>               | 2017              | 16    | ICU | Observational | ARDS, mixed              | EIT                                                                                               | N/A                                   |
| Estoos <sup>70</sup>               | 2023              | 69    | ICU | Observational | ARDS, COVID-19, ECMO     | Esophageal balloon                                                                                | N/A                                   |
| Falde <sup>71</sup>                | 2020 <sup>a</sup> | 50    | OR  | RCT           | Laparoscopic, normal, OR | Esophageal balloon                                                                                | Physiologic measures                  |
| Fellahi <sup>72</sup>              | 1998              | 12    | ICU | Observational | Mixed                    | Compliance                                                                                        | N/A                                   |
| Fengmei <sup>73</sup>              | 2012              | 23    | ICU | Observational | ARDS                     | Compliance, dead space                                                                            | N/A                                   |
| Fernandez Mondejar <sup>74</sup>   | 1992              | 14    | ICU | Observational | Mixed                    | Auto-PEEP                                                                                         | N/A                                   |
| Fernandez-Bustamante <sup>75</sup> | 2020              | 37    | OR  | RCT           | Normal, OR               | Compliance, esophageal balloon                                                                    | Physiologic measures                  |

|                           |                   |                    |     |                     |                          |                                                                                                                      |                             |
|---------------------------|-------------------|--------------------|-----|---------------------|--------------------------|----------------------------------------------------------------------------------------------------------------------|-----------------------------|
| Ferrando <sup>76</sup>    | 2017              | 36                 | OR  | RCT                 | Normal, OR               | Compliance                                                                                                           | Physiologic measures        |
| Ferrando <sup>77</sup>    | 2018              | 30                 | OR  | Observational       | Laparoscopic, normal, OR | Oxygenation                                                                                                          | N/A                         |
| Ferrando <sup>78</sup>    | 2018              | 1,012              | OR  | RCT                 | Normal, OR               | Compliance                                                                                                           | Postoperative complications |
| Florio <sup>79</sup>      | 2020              | 120                | ICU | Nonrandomized trial | ARDS, obese              | Compliance, esophageal balloon, low PEEP-F <sub>I</sub> O <sub>2</sub> table                                         | N/A                         |
| Franchineau <sup>80</sup> | 2017              | 15                 | ICU | Observational       | ARDS, ECMO               | EIT                                                                                                                  | N/A                         |
| Franchineau <sup>81</sup> | 2020              | 21                 | ICU | Observational       | ARDS, ECMO, prone        | EIT                                                                                                                  | N/A                         |
| Fumagalli <sup>82</sup>   | 2019              | 14                 | ICU | Observational       | ARDS, obese              | Compliance, esophageal balloon, low PEEP-F <sub>I</sub> O <sub>2</sub> table                                         | N/A                         |
| Gallagher <sup>83</sup>   | 1980              | 315                | ICU | Observational       | AHRF                     | Shunt                                                                                                                | N/A                         |
| Gao <sup>84</sup>         | 2023              | 46                 | OR  | RCT                 | Laparoscopic, normal, OR | Oxygenation                                                                                                          | Physiologic measures        |
| Gernoth <sup>85</sup>     | 2009              | 12                 | ICU | Observational       | ARDS                     | Compliance                                                                                                           | N/A                         |
| Gibot <sup>86</sup>       | 2021              | 17                 | ICU | Observational       | ARDS, COVID-19           | EIT, esophageal balloon, high PEEP-F <sub>I</sub> O <sub>2</sub> table, low PEEP-F <sub>I</sub> O <sub>2</sub> table | N/A                         |
| Gil Cano <sup>87</sup>    | 2012              | 9                  | ICU | Observational       | ARDS                     | Compliance                                                                                                           | N/A                         |
| Girgis <sup>88</sup>      | 2006              | 20                 | ICU | Observational       | ARDS                     | Oxygenation                                                                                                          | N/A                         |
| Girrbach <sup>89</sup>    | 2020              | 40                 | OR  | RCT                 | Laparoscopic, normal, OR | EIT                                                                                                                  | Physiologic measures        |
| Girrbach <sup>90</sup>    | 2022              | 45 <sup>b</sup>    | OR  | Reanalysis          | Laparoscopic, normal, OR | Compliance, EIT                                                                                                      | N/A                         |
| Glerant <sup>91</sup>     | 2005              | 9                  | ICU | Observational       | COPD                     | Auto-PEEP                                                                                                            | N/A                         |
| Goligher <sup>92</sup>    | 2014              | 1,732 <sup>b</sup> | ICU | Reanalysis          | ARDS                     | High PEEP-F <sub>I</sub> O <sub>2</sub> table, low PEEP-F <sub>I</sub> O <sub>2</sub> table                          | N/A                         |
| Grasso <sup>93</sup>      | 2005              | 19                 | ICU | Observational       | ARDS                     | High PEEP-F <sub>I</sub> O <sub>2</sub> table, low PEEP-F <sub>I</sub> O <sub>2</sub> table                          | N/A                         |
| Grasso <sup>94</sup>      | 2007              | 15                 | ICU | Observational       | ARDS                     | Low PEEP-F <sub>I</sub> O <sub>2</sub> table, stress index                                                           | N/A                         |
| Grasso <sup>95</sup>      | 2012              | 14                 | ICU | Observational       | ARDS                     | Esophageal balloon                                                                                                   | N/A                         |
| Grasso <sup>96</sup>      | 2020              | 8                  | ICU | Crossover           | ARDS                     | Esophageal balloon                                                                                                   | N/A                         |
| Grivans <sup>97</sup>     | 2022              | 10                 | ICU | Observational       | AHRF                     | EIT, esophageal balloon                                                                                              | N/A                         |
| Guerin <sup>98</sup>      | 2005              | 10                 | ICU | Observational       | COPD                     | Auto-PEEP                                                                                                            | N/A                         |
| Guervilly <sup>99</sup>   | 2022              | 39                 | ICU | RCT                 | ARDS, ECMO               | Esophageal balloon                                                                                                   | Biomarkers                  |
| Halawa <sup>100</sup>     | 2021              | 58                 | OR  | RCT                 | Normal, OR               | Compliance                                                                                                           | Physiologic measures        |
| Hamama <sup>101</sup>     | 2021              | 110                | ICU | RCT                 | ARDS                     | Driving pressure, low PEEP-F <sub>I</sub> O <sub>2</sub> table                                                       | 28-day mortality            |
| Hata <sup>102</sup>       | 2012              | 50                 | ICU | Observational       | ARDS                     | PV curves                                                                                                            | N/A                         |
| He <sup>103</sup>         | 2016              | 50                 | OR  | RCT                 | Laparoscopic, normal, OR | Compliance, EIT                                                                                                      | Physiologic measures        |
| He <sup>104</sup>         | 2021              | 117                | ICU | RCT                 | ARDS                     | EIT, low PEEP-F <sub>I</sub> O <sub>2</sub> table                                                                    | 28-day mortality            |
| Heines <sup>105</sup>     | 2018              | 39                 | ICU | Observational       | ARDS                     | EIT, low PEEP-F <sub>I</sub> O <sub>2</sub> table                                                                    | N/A                         |
| Heines <sup>106</sup>     | 2022              | 45                 | ICU | Observational       | ARDS, post-operative     | Compliance, EIT                                                                                                      | N/A                         |
| Heines <sup>107</sup>     | 2022              | 80                 | ICU | Observational       | AHRF, COVID-19           | EIT                                                                                                                  | N/A                         |
| Herrmann <sup>108</sup>   | 2013 <sup>a</sup> | 46 <sup>b</sup>    | ICU | Reanalysis          | ARDS                     | Esophageal balloon, low PEEP-F <sub>I</sub> O <sub>2</sub> table                                                     | N/A                         |
| Hodgson <sup>109</sup>    | 2011              | 20                 | ICU | RCT                 | ARDS                     | Low PEEP-F <sub>I</sub> O <sub>2</sub> table, oxygenation                                                            | Physiologic measures        |
| Hodgson <sup>110</sup>    | 2011              | 20                 | ICU | Observational       | ARDS                     | Oxygenation                                                                                                          | N/A                         |
| Hodgson <sup>111</sup>    | 2019              | 115                | ICU | RCT                 | ARDS                     | Low PEEP-F <sub>I</sub> O <sub>2</sub> table, oxygenation                                                            | VFD at 28 days              |
| Holzapfel <sup>112</sup>  | 1983              | 15                 | ICU | Observational       | ARDS                     | Shunt                                                                                                                | N/A                         |
| Hsu <sup>113</sup>        | 2021              | 87                 | ICU | RCT                 | ARDS                     | EIT, PV curves                                                                                                       | Physiologic measures        |
| Huang <sup>114</sup>      | 2013              | 30                 | ICU | Observational       | ARDS                     | Compliance, oxygenation, PV curves, stress index                                                                     | N/A                         |

|                              |                   |     |     |                     |                          |                                                                                             |                                        |
|------------------------------|-------------------|-----|-----|---------------------|--------------------------|---------------------------------------------------------------------------------------------|----------------------------------------|
| Huh <sup>115</sup>           | 2009              | 57  | ICU | RCT                 | ARDS                     | Compliance, low PEEP-F <sub>1</sub> O <sub>2</sub> table                                    | Physiologic measures                   |
| Ibrahim <sup>116</sup>       | 2021              | 62  | ICU | Observational       | Postoperative            | Compliance, esophageal balloon, oxygenation                                                 | N/A                                    |
| Imanaka <sup>117</sup>       | 2010              | 40  | ICU | Nonrandomized trial | Postoperative            | Oxygenation                                                                                 | N/A                                    |
| Jardin <sup>118</sup>        | 1981              | 17  | ICU | Observational       | Mixed                    | Compliance                                                                                  | N/A                                    |
| Jimenez <sup>119</sup>       | 2023              | 16  | ICU | Crossover           | ARDS                     | EIT, high PEEP-F <sub>1</sub> O <sub>2</sub> table                                          | N/A                                    |
| Jin <sup>120</sup>           | 2022              | 78  | OR  | RCT                 | Normal, OR, prone        | Driving pressure                                                                            | Post-operative pulmonary complications |
| Jolliet <sup>121</sup>       | 2003              | 10  | ICU | Nonrandomized trial | COPD                     | Auto-PEEP                                                                                   | N/A                                    |
| Jonkman <sup>122</sup>       | 2023              | 108 | ICU | Observational       | ARDS, COVID-19           | EIT                                                                                         | N/A                                    |
| Kacmarek <sup>123</sup>      | 2016              | 200 | ICU | RCT                 | ARDS                     | Compliance, low PEEP-F <sub>1</sub> O <sub>2</sub> table                                    | 60-day mortality                       |
| Kanus <sup>124</sup>         | 2011 <sup>a</sup> | 41  | ICU | Observational       | ARDS                     | Compliance, oxygenation                                                                     | N/A                                    |
| Karsten <sup>125</sup>       | 2015              | 20  | ICU | Observational       | Post-operative           | Compliance, EIT                                                                             | N/A                                    |
| Karsten <sup>126</sup>       | 2018              | 15  | ICU | Observational       | Mixed                    | Compliance, EIT                                                                             | N/A                                    |
| Khan <sup>127</sup>          | 2018              | 490 | ICU | RCT                 | ARDS                     | Compliance, low PEEP-F <sub>1</sub> O <sub>2</sub> table                                    | 28-day mortality                       |
| Kirby <sup>128</sup>         | 1975              | 28  | ICU | Observational       | ARDS                     | Shunt                                                                                       | N/A                                    |
| Knothe <sup>129</sup>        | 2000              | 18  | ICU | Observational       | Mixed, polytrauma        | Oxygenation                                                                                 | N/A                                    |
| Kong <sup>130</sup>          | 2001              | 10  | ICU | Observational       | COPD                     | Auto-PEEP                                                                                   | N/A                                    |
| Krebs <sup>131</sup>         | 2018              | 13  | ICU | Nonrandomized trial | ARDS                     | Compliance, low PEEP-F <sub>1</sub> O <sub>2</sub> table                                    | N/A                                    |
| Kuckelt <sup>132</sup>       | 1981              | 13  | ICU | Observational       | ARDS                     | Compliance                                                                                  | N/A                                    |
| Kung <sup>133</sup>          | 2019              | 120 | ICU | RCT                 | ARDS                     | Compliance, low PEEP-F <sub>1</sub> O <sub>2</sub> table                                    | 28-day mortality                       |
| Lam <sup>134</sup>           | 2019              | 66  | ICU | RCT                 | ARDS, burns              | Compliance, low PEEP-F <sub>1</sub> O <sub>2</sub> table                                    | N/A                                    |
| Li <sup>135</sup>            | 2022              | 120 | OR  | RCT                 | Laparoscopic, normal, OR | Compliance                                                                                  | Physiologic measures                   |
| Liang <sup>136</sup>         | 2018              | 10  | ICU | Observational       | COPD                     | Plateau pressure                                                                            | N/A                                    |
| Liou <sup>137</sup>          | 2022              | 29  | ICU | Observational       | ARDS, obese              | Esophageal balloon                                                                          | N/A                                    |
| Liu <sup>138</sup>           | 2019              | 120 | OR  | RCT                 | Laparoscopic, normal, OR | Compliance                                                                                  | Physiologic measures                   |
| Liu <sup>139</sup>           | 2020              | 96  | OR  | RCT                 | Normal, OR               | Compliance                                                                                  | Physiologic measures                   |
| Liu <sup>140</sup>           | 2020              | 87  | OR  | RCT                 | Laparoscopic, normal, OR | Compliance                                                                                  | Physiologic measures                   |
| Liu <sup>141</sup>           | 2022              | 27  | ICU | Observational       | ARDS, COPD               | EIT, low PEEP-F <sub>1</sub> O <sub>2</sub> table                                           | N/A                                    |
| Long <sup>142</sup>          | 2015              | 18  | ICU | Observational       | ARDS                     | EIT                                                                                         | N/A                                    |
| Lopez-Herrera <sup>143</sup> | 2022              | 32  | OR  | Crossover           | Normal, OR               | Compliance                                                                                  | N/A                                    |
| Lowhagen <sup>144</sup>      | 2011              | 16  | ICU | Observational       | ARDS                     | Compliance, oxygenation, shunt                                                              | N/A                                    |
| Mahto <sup>145</sup>         | 2013              | 24  | ICU | RCT                 | ARDS                     | Compliance, oxygenation                                                                     | Physiologic measures                   |
| Maisch <sup>146</sup>        | 2008              | 20  | OR  | Observational       | Normal, OR               | Compliance, dead space                                                                      | N/A                                    |
| Mancebo <sup>147</sup>       | 2000              | 20  | ICU | Observational       | COPD, weaning            | Airway occlusion pressure (P0.1)                                                            | N/A                                    |
| Mazzinari <sup>148</sup>     | 2020              | 30  | OR  | Observational       | Laparoscopic, normal, OR | Intra-abdominal pressure                                                                    | N/A                                    |
| Meade <sup>149</sup>         | 2008              | 983 | ICU | RCT                 | ARDS                     | High PEEP-F <sub>1</sub> O <sub>2</sub> table, low PEEP-F <sub>1</sub> O <sub>2</sub> table | Hospital mortality                     |
| Mercado <sup>150</sup>       | 2018              | 20  | ICU | Nonrandomized trial | ARDS                     | Compliance, oxygenation                                                                     | N/A                                    |
| Mercat <sup>151</sup>        | 2008              | 767 | ICU | RCT                 | ARDS                     | Plateau pressure                                                                            | 28-day mortality                       |
| Mezidi <sup>152</sup>        | 2017 <sup>a</sup> | 32  | ICU | Crossover           | ARDS, prone              | Esophageal balloon, low PEEP-F <sub>1</sub> O <sub>2</sub> table                            | N/A                                    |
| Mezidi <sup>153</sup>        | 2020              | 15  | ICU | Observational       | ARDS, COVID-19, obese    | Esophageal balloon                                                                          | N/A                                    |
| Miller <sup>154</sup>        | 1992              | 40  | ICU | Observational       | ARDS                     | Shunt                                                                                       | N/A                                    |

|                                       |                   |                  |     |                     |                          |                                                                       |                                                                     |
|---------------------------------------|-------------------|------------------|-----|---------------------|--------------------------|-----------------------------------------------------------------------|---------------------------------------------------------------------|
| Mini <sup>155</sup>                   | 2021              | 82               | OR  | RCT                 | Normal, OR               | Driving pressure                                                      | Atelectasis by ultrasound                                           |
| Mittermaier <sup>156</sup>            | 2020              | 23               | ICU | Observational       | ARDS, COVID-19           | Oxygenation                                                           | N/A                                                                 |
| Mlček <sup>157</sup>                  | 2021              | 5                | ICU | Observational       | ARDS, COVID-19           | EIT                                                                   | N/A                                                                 |
| Moghaddas-Ghahfarrokhi <sup>158</sup> | 2022              | 41               | ICU | RCT                 | AHRF                     | Oxygenation                                                           | Not reported                                                        |
| Mohamed <sup>159</sup>                | 2023              | 52               | ICU | Observational       | ARDS                     | Ultrasound                                                            | N/A                                                                 |
| Monge Garcia <sup>160</sup>           | 2012              | 21               | ICU | Observational       | AHRF                     | Compliance                                                            | N/A                                                                 |
| Moran <sup>161</sup>                  | 2011              | 13               | ICU | Observational       | ARDS                     | Oxygenation                                                           | N/A                                                                 |
| Mrochen <sup>162</sup>                | 1982              | 15               | ICU | Observational       | Mixed                    | Computer-based                                                        | N/A                                                                 |
| Munoz <sup>163</sup>                  | 1993              | 12               | ICU | Observational       | Mixed                    | Auto-PEEP                                                             | N/A                                                                 |
| Nakazawa <sup>164</sup>               | 2022              | 14               | OR  | Observational       | Laparoscopic, normal, OR | Esophageal balloon                                                    | N/A                                                                 |
| Nelson <sup>165</sup>                 | 1987              | 38               | ICU | RCT                 | AHRF                     | Oxygenation, shunt                                                    | Not reported                                                        |
| Nestler <sup>166</sup>                | 2017              | 50               | OR  | RCT                 | Laparoscopic, obese, OR  | EIT                                                                   | Physiologic measures                                                |
| Obi <sup>167</sup>                    | 2018              | 25               | ICU | RCT                 | Obese                    | Compliance, esophageal balloon                                        | Percentage vent-free at 28 days, duration of mechanical ventilation |
| Oczenski <sup>168</sup>               | 2004              | 30               | ICU | Observational       | ARDS                     | Oxygenation                                                           | N/A                                                                 |
| Oller-Sanchez <sup>169</sup>          | 2021 <sup>a</sup> | 15               | ICU | Observational       | ARDS, COVID-19           | Plateau pressure                                                      | N/A                                                                 |
| Otahal <sup>170</sup>                 | 2022              | 10               | ICU | Observational       | ARDS, COVID-19, prone    | EIT                                                                   | N/A                                                                 |
| Pan <sup>171</sup>                    | 2021              | 20               | ICU | Observational       | ARDS, COVID-19           | Compliance, low PEEP-F <sub>I</sub> O <sub>2</sub> table, oxygenation | N/A                                                                 |
| Pan <sup>172</sup>                    | 2022              | 60               | OR  | RCT                 | Laparoscopic, normal, OR | EIT                                                                   | Postoperative pulmonary complications                               |
| Passath <sup>173</sup>                | 2010              | 20               | ICU | Observational       | Mixed                    | NAVA                                                                  | N/A                                                                 |
| Pereira <sup>174</sup>                | 2019              | 40               | OR  | RCT                 | Laparoscopic, normal, OR | EIT                                                                   | Physiologic measures                                                |
| Perier <sup>175</sup>                 | 2020              | 17               | ICU | Nonrandomized trial | ARDS, COVID-19           | EIT                                                                   | N/A                                                                 |
| Persson <sup>176</sup>                | 2018              | 24               | OR  | Observational       | Normal, OR               | Compliance, esophageal balloon                                        | N/A                                                                 |
| Persson <sup>177</sup>                | 2022              | 24 <sup>b</sup>  | OR  | Reanalysis          | Normal, OR               | EELV                                                                  | N/A                                                                 |
| Pestana <sup>178</sup>                | 2003              | 27               | ICU | Observational       | ARDS                     | PV curves                                                             | N/A                                                                 |
| Peyton <sup>179</sup>                 | 2022              | 70               | OR  | RCT                 | Laparoscopic, normal, OR | Compliance                                                            | Physiologic measures                                                |
| Pintado <sup>180</sup>                | 2013              | 70               | ICU | RCT                 | ARDS                     | Compliance, low PEEP-F <sub>I</sub> O <sub>2</sub> table              | Physiologic measures                                                |
| Pintado <sup>181</sup>                | 2016              | 159 <sup>b</sup> | ICU | Reanalysis          | ARDS                     | Compliance, low PEEP-F <sub>I</sub> O <sub>2</sub> table              | N/A                                                                 |
| Piriyapatsom <sup>182</sup>           | 2020              | 44               | OR  | RCT                 | Laparoscopic, normal, OR | Esophageal balloon                                                    | Physiologic measures                                                |
| Pirrone <sup>183</sup>                | 2016              | 14               | ICU | Observational       | Obese                    | Driving pressure, esophageal balloon                                  | N/A                                                                 |
| Povoa <sup>184</sup>                  | 2004              | 8                | ICU | Observational       | ARDS                     | Oxygenation                                                           | N/A                                                                 |
| Puel <sup>185</sup>                   | 2020              | 15               | ICU | Observational       | ARDS, ECMO               | EIT                                                                   | N/A                                                                 |
| Putensen <sup>186</sup>               | 1993              | 10               | ICU | Observational       | AHRF                     | PV curves                                                             | N/A                                                                 |
| Qian <sup>187</sup>                   | 2021              | 80               | OR  | RCT                 | Normal, OR, prone        | Compliance                                                            | Physiologic measures                                                |
| Radwan <sup>188</sup>                 | 2021              | 120              | ICU | Nonrandomized trial | ARDS                     | Oxygenation, ultrasound                                               | N/A                                                                 |
| Rafat <sup>189</sup>                  | 2022 <sup>a</sup> | 65               | ICU | Nonrandomized trial | ARDS                     | Oxygenation, ultrasound                                               | N/A                                                                 |
| Ranieri <sup>190</sup>                | 1999              | 44               | ICU | RCT                 | ARDS                     | PV curves                                                             | Biomarkers                                                          |
| Regli <sup>191</sup>                  | 2018              | 15               | ICU | Crossover           | Mixed                    | Intra-abdominal pressure                                              | N/A                                                                 |
| Reilkoff <sup>192</sup>               | 2022 <sup>a</sup> | 9                | ICU | Observational       | Obese                    | Esophageal balloon                                                    | N/A                                                                 |
| Rezaiguia-Delclaux <sup>193</sup>     | 2022              | 122              | ICU | Observational       | ARDS                     | Driving pressure, oxygenation                                         | N/A                                                                 |

|                                |                   |                  |     |                     |                       |                                                                   |                      |
|--------------------------------|-------------------|------------------|-----|---------------------|-----------------------|-------------------------------------------------------------------|----------------------|
| Richard <sup>194</sup>         | 2001              | 15               | ICU | Observational       | ARDS                  | PV curves                                                         | N/A                  |
| Richard <sup>195</sup>         | 2003              | 15               | ICU | Observational       | ARDS                  | Plateau pressure, PV curves                                       | N/A                  |
| Rode <sup>196</sup>            | 2012              | 17               | ICU | Observational       | ARDS                  | PV curves, ultrasound                                             | N/A                  |
| Rodriguez <sup>197</sup>       | 2011 <sup>a</sup> | 11               | ICU | Observational       | ARDS                  | Dead space, esophageal balloon                                    | N/A                  |
| Rohrs <sup>198</sup>           | 2019 <sup>a</sup> | 18               | ICU | Observational       | Obese                 | Esophageal balloon                                                | N/A                  |
| Rollas <sup>199</sup>          | 2022              | 22               | ICU | RCT                 | ARDS                  | EELV, oxygenation                                                 | N/A                  |
| Rossi <sup>200</sup>           | 1994              | 8                | ICU | Crossover           | COPD                  | Auto-PEEP                                                         | N/A                  |
| Rotman <sup>201</sup>          | 2016              | 15               | ICU | Nonrandomized trial | ARDS                  | Low PEEP-F <sub>I</sub> O <sub>2</sub> table, oxygenation         | N/A                  |
| Rowley <sup>202</sup>          | 2021              | 20               | ICU | Observational       | Obese                 | Esophageal balloon                                                | N/A                  |
| Ruszkai <sup>203</sup>         | 2021              | 39               | OR  | RCT                 | Normal, OR            | Compliance                                                        | Physiologic measures |
| Sahetya <sup>204</sup>         | 2020              | 10               | ICU | Observational       | ARDS                  | Driving pressure, low PEEP-F <sub>I</sub> O <sub>2</sub> table    | N/A                  |
| Salem <sup>205</sup>           | 2020              | 60               | ICU | RCT                 | ARDS                  | Low PEEP-F <sub>I</sub> O <sub>2</sub> table, ultrasound          | Physiologic measures |
| Samadder <sup>206</sup>        | 2020 <sup>a</sup> | 30               | ICU | RCT                 | ARDS                  | High PEEP-F <sub>I</sub> O <sub>2</sub> table, ultrasound         | Physiologic measures |
| Sanchez Giralto <sup>207</sup> | 2020 <sup>a</sup> | 19               | ICU | Observational       | ARDS, COVID-19        | Compliance, EIT                                                   | N/A                  |
| Sanchez Galindo <sup>208</sup> | 2021 <sup>a</sup> | 7                | ICU | Observational       | ARDS, COVID-19, obese | Esophageal balloon                                                | N/A                  |
| Sang <sup>209</sup>            | 2021              | 20               | ICU | Observational       | ARDS, COVID-19        | Compliance                                                        | N/A                  |
| Sarge <sup>210</sup>           | 2021              | 200 <sup>b</sup> | ICU | Reanalysis          | ARDS                  | Esophageal balloon, high PEEP-F <sub>I</sub> O <sub>2</sub> table | N/A                  |
| Saxena <sup>211</sup>          | 2020              | 60               | ICU | RCT                 | ARDS                  | PV curves                                                         | Physiologic measures |
| Scaramuzzo <sup>212</sup>      | 2020              | 20               | ICU | Crossover           | ARDS                  | EIT, esophageal balloon                                           | N/A                  |
| Schmitt <sup>213</sup>         | 2001              | 16               | ICU | Observational       | ARDS                  | Compliance, PV curves                                             | N/A                  |
| Schulz <sup>214</sup>          | 2018 <sup>a</sup> | 18               | OR  | Observational       | Normal, OR            | EIT                                                               | N/A                  |
| Simon <sup>215</sup>           | 2021              | 40 <sup>b</sup>  | OR  | Reanalysis          | Obese, OR             | EIT                                                               | N/A                  |
| Singer <sup>216</sup>          | 1989              | 10               | ICU | Observational       | AHRF                  | Oxygen delivery                                                   | N/A                  |
| Slobod <sup>217</sup>          | 2022              | 3                | ICU | Observational       | AHRF                  | EIT, esophageal balloon                                           | N/A                  |
| Somhorst <sup>218</sup>        | 2022              | 75               | ICU | Observational       | ARDS, COVID-19        | EIT, high PEEP-F <sub>I</sub> O <sub>2</sub> table                | N/A                  |
| Soroksky <sup>219</sup>        | 2015              | 6                | ICU | Observational       | ARDS                  | Esophageal balloon                                                | N/A                  |
| Soule <sup>220</sup>           | 2021              | 23               | ICU | Observational       | ECMO                  | EIT                                                               | N/A                  |
| Stefanidis <sup>221</sup>      | 2011              | 10               | ICU | Nonrandomized trial | ARDS                  | Ultrasound                                                        | N/A                  |
| Su <sup>222</sup>              | 2018              | 23               | ICU | Observational       | ARDS                  | EIT                                                               | N/A                  |
| Su <sup>223</sup>              | 2021              | 8                | ICU | Observational       | ARDS                  | Compliance, EIT                                                   | N/A                  |
| Suh <sup>224</sup>             | 2003              | 17               | ICU | Observational       | ARDS                  | Oxygenation                                                       | N/A                  |
| Suter <sup>225</sup>           | 1975              | 15               | ICU | Observational       | ARDS                  | Compliance                                                        | N/A                  |
| Szlavec <sup>226</sup>         | 2014              | 2                | ICU | Observational       | Mixed                 | Computer-based                                                    | N/A                  |
| Taenaka <sup>227</sup>         | 2023              | 43               | ICU | Observational       | ARDS, COVID-19        | R/I ratio                                                         | N/A                  |
| Talmor <sup>228</sup>          | 2008              | 61               | ICU | RCT                 | ARDS                  | Esophageal balloon, low PEEP-F <sub>I</sub> O <sub>2</sub> table  | Physiologic measures |
| Tang <sup>229</sup>            | 2017              | 40               | ICU | Observational       | ARDS                  | Oxygenation, ultrasound                                           | N/A                  |
| Teggie Droghi <sup>230</sup>   | 2018 <sup>a</sup> | 17               | ICU | Observational       | ARDS, obese           | Compliance, esophageal probe                                      | N/A                  |
| Theerawit <sup>231</sup>       | 2023              | 12               | ICU | Observational       | ARDS                  | EIT, ultrasound                                                   | N/A                  |
| Timenetsky <sup>232</sup>      | 2017 <sup>a</sup> | 7                | ICU | Observational       | Mixed                 | EIT                                                               | N/A                  |
| Tomicic Flores <sup>233</sup>  | 2007              | 27               | ICU | Observational       | ARDS                  | PV curves                                                         | N/A                  |

|                            |                   |     |     |                     |                          |                                                                                             |                                    |
|----------------------------|-------------------|-----|-----|---------------------|--------------------------|---------------------------------------------------------------------------------------------|------------------------------------|
| Tonelotto <sup>234</sup>   | 2020              | 18  | OR  | Observational       | Normal, OR               | EIT, ultrasound                                                                             | N/A                                |
| Toth <sup>235</sup>        | 2007              | 18  | ICU | Observational       | ARDS                     | Oxygenation                                                                                 | N/A                                |
| Tremper <sup>236</sup>     | 1981              | 15  | ICU | Observational       | Post-operative           | Oxygenation                                                                                 | N/A                                |
| Tsai-Fen <sup>237</sup>    | 2017 <sup>a</sup> | 68  | ICU | Observational       | ARDS                     | EIT, PV curves                                                                              | N/A                                |
| Tugrul <sup>238</sup>      | 2005              | 25  | ICU | Observational       | ARDS                     | PV curves                                                                                   | N/A                                |
| Turani <sup>239</sup>      | 2009 <sup>a</sup> | 20  | ICU | Observational       | ARDS                     | EELV                                                                                        | N/A                                |
| Tusman <sup>240</sup>      | 2014              | 20  | OR  | Observational       | Laparoscopic, obese, OR  | Dead space, oxygenation                                                                     | N/A                                |
| Tusman <sup>241</sup>      | 2019              | 12  | OR  | Observational       | Obese, OR                | Esophageal balloon                                                                          | N/A                                |
| Tusman <sup>242</sup>      | 2022              | 40  | OR  | Observational       | Laparoscopic, normal, OR | EELV                                                                                        | N/A                                |
| Tzoufi <sup>243</sup>      | 2005              | 10  | ICU | Observational       | COPD                     | Auto-PEEP                                                                                   | N/A                                |
| Valentini <sup>244</sup>   | 2015              | 20  | ICU | Observational       | ARDS                     | Compliance, low PEEP-F <sub>I</sub> O <sub>2</sub> table, plateau pressure                  | N/A                                |
| Valk <sup>245</sup>        | 2021              | 933 | ICU | Observational       | ARDS, COVID-19           | High PEEP-F <sub>I</sub> O <sub>2</sub> table, low PEEP-F <sub>I</sub> O <sub>2</sub> table | N/A                                |
| Van Der Zee <sup>246</sup> | 2019 <sup>a</sup> | 8   | ICU | Observational       | ARDS                     | Esophageal balloon                                                                          | N/A                                |
| Van Hecke <sup>247</sup>   | 2019              | 100 | OR  | RCT                 | Laparoscopic, obese, OR  | Compliance                                                                                  | Postoperative complications        |
| Veiga <sup>248</sup>       | 2020 <sup>a</sup> | 28  | ICU | RCT                 | ARDS                     | Compliance, EIT, esophageal balloon, low PEEP-F <sub>I</sub> O <sub>2</sub> table           | Physiologic measures               |
| Venus <sup>249</sup>       | 1979              | 15  | ICU | Observational       | ARDS                     | Shunt                                                                                       | N/A                                |
| Villar <sup>250</sup>      | 2006              | 103 | ICU | RCT                 | ARDS                     | PV curves                                                                                   | ICU mortality                      |
| Vimpere <sup>251</sup>     | 2018 <sup>a</sup> | 10  | ICU | Observational       | ARDS, obese              | Esophageal balloon, plateau pressure                                                        | N/A                                |
| Walkinshaw <sup>252</sup>  | 1980              | 11  | ICU | Observational       | ARDS                     | Shunt                                                                                       | N/A                                |
| Wang <sup>253</sup>        | 2019              | 23  | ICU | RCT                 | ARDS                     | Esophageal balloon, low PEEP F <sub>I</sub> O <sub>2</sub> table                            | Physiologic measures               |
| Wang <sup>254</sup>        | 2020              | 104 | ICU | RCT                 | ARDS, ECMO               | Esophageal balloon                                                                          | Weaning from ECMO                  |
| Wang <sup>255</sup>        | 2022              | 120 | OR  | RCT                 | Laparoscopic, normal, OR | Compliance                                                                                  | Physiologic measures               |
| Wang <sup>256</sup>        | 2023              | 40  | OR  | RCT                 | Laparoscopic, normal, OR | Compliance                                                                                  | Physiologic measures               |
| Weber <sup>257</sup>       | 2020              | 60  | OR  | RCT                 | Normal, OR               | Compliance                                                                                  | Physiologic measures               |
| Wu <sup>258</sup>          | 2015              | 12  | ICU | Observational       | ARDS                     | Esophageal balloon, intra-abdominal pressure                                                | N/A                                |
| Xu <sup>259</sup>          | 2022              | 51  | OR  | RCT                 | Laparoscopic, normal, OR | Driving pressure                                                                            | Atelectasis by ultrasound          |
| Yang <sup>260</sup>        | 2013              | 15  | ICU | Crossover           | ARDS                     | Esophageal balloon, intra-abdominal pressure                                                | N/A                                |
| Yeremenko <sup>261</sup>   | 2022              | 40  | ICU | RCT                 | Postoperative            | Computer-based                                                                              | Time spent manipulating ventilator |
| Yin <sup>262</sup>         | 2020              | 43  | ICU | Nonrandomized trial | ARDS, ECMO               | Compliance, PV curves                                                                       | N/A                                |
| Yoon <sup>263</sup>        | 2021              | 60  | OR  | RCT                 | Laparoscopic, normal, OR | Compliance                                                                                  | Atelectasis by ultrasound          |
| Yun <sup>264</sup>         | 2016              | 20  | ICU | Observational       | ARDS                     | Oxygenation                                                                                 | N/A                                |
| Zhang <sup>265</sup>       | 2021              | 148 | OR  | RCT                 | Normal, OR               | Driving pressure                                                                            | Postoperative complications        |
| Zhang <sup>266</sup>       | 2022              | 48  | OR  | RCT                 | Laparoscopic, normal, OR | Driving pressure                                                                            | EIT measurement                    |
| Zhao <sup>267</sup>        | 2010              | 10  | OR  | Observational       | Normal, OR               | Compliance, EIT                                                                             | N/A                                |
| Zhao <sup>268</sup>        | 2019              | 55  | ICU | Nonrandomized trial | ARDS                     | EIT, PV curves                                                                              | N/A                                |
| Zhao <sup>269</sup>        | 2019              | 30  | ICU | Observational       | ARDS                     | EIT                                                                                         | N/A                                |
| Zhao <sup>270</sup>        | 2022              | 42  | ICU | Observational       | ARDS                     | EIT                                                                                         | N/A                                |
| Zhou <sup>271</sup>        | 2021              | 89  | OR  | RCT                 | Laparoscopic, normal, OR | Compliance, oxygenation                                                                     | Physiologic measures               |



<sup>a</sup>Published conference abstract

<sup>b</sup>Secondary analysis so sample size does not count towards total

AHRF = acute hypoxemic respiratory failure; ARDS = acute respiratory distress syndrome; COPD = chronic obstructive pulmonary disease; CT = computed tomography; ECMO = extracorporeal membrane oxygenation; EELV = end-expiratory lung volume; EIT = electrical impedance tomography; ICU = intensive care unit; NAVA = neurally adjusted ventilatory assist; OR = operating room; PEEP = positive end-expiratory pressure; PV = pressure-volume; R/I = recruitment to inflation; RCT = randomized controlled trial; VFD = ventilator-free days

**eTable 7** Specific modalities of imaging-based methods of determining optimal positive end-expiratory pressure

| Imaging modality | Setting                                    |                                                  |                                                |                                                     |
|------------------|--------------------------------------------|--------------------------------------------------|------------------------------------------------|-----------------------------------------------------|
|                  | Overall<br>( <i>N</i> = 271), <i>n</i> (%) | ICU ( <i>N</i> = 216), <i>n</i> (%) <sup>a</sup> | OR ( <i>N</i> = 55), <i>n</i> (%) <sup>a</sup> | RCTs<br>( <i>N</i> = 73), <i>n</i> (%) <sup>a</sup> |
| EIT              | 54 (20%)                                   | 42 (19%)                                         | 12 (22%)                                       | 8 (11%)                                             |
| Ultrasound       | 12 (4%)                                    | 9 (4%)                                           | 3 (5%)                                         | 3 (4%)                                              |
| CT               | 1 (0.4%)                                   | 1 (0.5%)                                         | 0 (0%)                                         | 0 (0%)                                              |

<sup>a</sup>Percentages are for total studies within given column

CT = computed tomography; EIT = electrical impedance tomography; ICU = intensive care unit; OR = operating room; PEEP = positive end-expiratory pressure

**eTable 8** Publishing journals of randomized controlled trials

| Journal name                                         | Overall (n) | Setting |        |
|------------------------------------------------------|-------------|---------|--------|
|                                                      |             | ICU (n) | OR (n) |
| JAMA                                                 | 6           | 6       | 0      |
| Abstract                                             | 4           | 2       | 2      |
| Critical Care                                        | 4           | 4       | 0      |
| Critical Care Medicine                               | 4           | 4       | 0      |
| British Journal of Anesthesia                        | 3           | 0       | 3      |
| Journal of Clinical Medicine                         | 3           | 1       | 2      |
| NEJM                                                 | 3           | 3       | 0      |
| AJRCCM                                               | 2           | 2       | 0      |
| BMC Anesthesiology                                   | 2           | 0       | 2      |
| Egyptian Journal of Anesthesia                       | 2           | 2       | 0      |
| Journal of Clinical Monitoring and Computing         | 2           | 0       | 2      |
| Lancet Respiratory Medicine                          | 2           | 1       | 1      |
| Respiratory Care                                     | 2           | 1       | 1      |
| Acta Anaesthesiologica Scandinavia                   | 1           | 1       | 0      |
| American Journal of Translational Research           | 1           | 0       | 1      |
| Anaesthesia & Intensive Care                         | 1           | 0       | 1      |
| Anesthesia & Analgesia                               | 1           | 0       | 1      |
| Anesthesia Essays and Researches                     | 1           | 1       | 0      |
| Anesthesiology                                       | 1           | 0       | 1      |
| Annals of Translational Medicine                     | 1           | 0       | 1      |
| Brazilian Journal of Medical and Biological Research | 1           | 0       | 1      |
| Burns                                                | 1           | 1       | 0      |
| Chest                                                | 1           | 1       | 0      |
| Chinese Medical Journal                              | 1           | 0       | 1      |
| Clinical Medicine Insights                           | 1           | 1       | 0      |
| Clinical Neurology and Neurosurgery                  | 1           | 0       | 1      |
| Computational and Mathematical Methods in Medicine   | 1           | 0       | 1      |
| European Journal of Anesthesiology                   | 1           | 0       | 1      |
| Experimental & Clinical Transplantation              | 1           | 0       | 1      |
| Experimental & Therapeutic Medicine                  | 1           | 0       | 1      |
| Experimental Lung Research                           | 1           | 1       | 0      |
| General Reanimatology                                | 1           | 1       | 0      |
| Heart & Lung                                         | 1           | 0       | 1      |
| Indian Journal of Respiratory Care                   | 1           | 1       | 0      |
| Journal of Investigative Surgery                     | 1           | 0       | 1      |
| Journal of Isfahan Medical School                    | 1           | 1       | 0      |
| Journal of the Egyptian Society of Parasitology      | 1           | 1       | 0      |
| Medical Forum Monthly                                | 1           | 1       | 0      |
| Medicine                                             | 1           | 0       | 1      |
| Obesity Surgery                                      | 1           | 0       | 1      |
| Physiological Measurement                            | 1           | 1       | 0      |
| PLOS One                                             | 1           | 0       | 1      |
| Scientific Reports                                   | 1           | 0       | 1      |
| Surgery                                              | 1           | 0       | 1      |
| Surgery for Obesity and Related Diseases             | 1           | 0       | 1      |
| Technology & Health Care                             | 1           | 1       | 0      |
| Trials                                               | 1           | 0       | 1      |

AJRCCM = American Journal of Respiratory and Critical Care Medicine; BMC = BioMed Central; ICU = intensive care unit; JAMA = *Journal of the American Medical Association*; NEJM = *New England Journal of Medicine*; OR = operating room; PLOS = Public Library of Science

**eTable 9** Countries participating in randomized controlled trials

| Country      | Overall ( <i>n</i> ) | Setting          |                 |
|--------------|----------------------|------------------|-----------------|
|              |                      | ICU ( <i>n</i> ) | OR ( <i>n</i> ) |
| China        | 18                   | 3                | 15              |
| USA          | 9                    | 7                | 2               |
| Brazil       | 7                    | 6                | 1               |
| Spain        | 7                    | 5                | 2               |
| Egypt        | 5                    | 3                | 2               |
| India        | 5                    | 3                | 2               |
| Australia    | 4                    | 3                | 1               |
| Germany      | 4                    | 0                | 4               |
| South Korea  | 4                    | 3                | 1               |
| France       | 3                    | 2                | 0               |
| Italy        | 3                    | 2                | 1               |
| Canada       | 2                    | 2                | 0               |
| Saudi Arabia | 2                    | 2                | 0               |
| Taiwan       | 2                    | 2                | 0               |
| Argentina    | 1                    | 1                | 0               |
| Belgium      | 1                    | 0                | 1               |
| Chile        | 1                    | 1                | 0               |
| Colombia     | 1                    | 1                | 0               |
| Denmark      | 1                    | 1                | 0               |
| Hungary      | 1                    | 0                | 1               |
| Iran         | 1                    | 1                | 0               |
| Malaysia     | 1                    | 1                | 0               |
| Netherlands  | 1                    | 1                | 0               |
| New Zealand  | 1                    | 1                | 0               |
| Pakistan     | 1                    | 1                | 0               |
| Peru         | 1                    | 1                | 0               |
| Poland       | 1                    | 1                | 0               |
| Portugal     | 1                    | 1                | 0               |
| Russia       | 1                    | 1                | 0               |
| Switzerland  | 1                    | 1                | 0               |
| Thailand     | 1                    | 0                | 1               |
| Turkey       | 1                    | 1                | 0               |
| UK           | 1                    | 1                | 0               |
| Uruguay      | 1                    | 1                | 0               |
| Vietnam      | 1                    | 1                | 0               |

ICU = intensive care unit; OR = operating room

**eTable 10** Number of randomized controlled trials with significant differences in primary endpoint

| Study characteristic                     | Overall, <i>n</i> (%) | Primary endpoint<br><i>P</i> < 0.05, <i>n</i> (%) <sup>b</sup> | Setting, <i>n</i> (%) <sup>a</sup> |                                                                |               |                                                                |
|------------------------------------------|-----------------------|----------------------------------------------------------------|------------------------------------|----------------------------------------------------------------|---------------|----------------------------------------------------------------|
|                                          |                       |                                                                | ICU                                | Primary endpoint<br><i>P</i> < 0.05, <i>n</i> (%) <sup>b</sup> | OR            | Primary endpoint<br><i>P</i> < 0.05, <i>n</i> (%) <sup>b</sup> |
| Overall                                  | <i>N</i> = 73         | 42 (58%)                                                       | <i>N</i> = 39                      | 16 (41%)                                                       | <i>N</i> = 34 | 26 (76%)                                                       |
| Study design                             |                       |                                                                |                                    |                                                                |               |                                                                |
| Multicentered                            | 14 (19%)              | 4 (29%)                                                        | 12 (31%)                           | 3 (25%)                                                        | 2 (6%)        | 1 (50%)                                                        |
| Multinational                            | 6 (8%)                | 2 (33%)                                                        | 6 (15%)                            | 2 (33%)                                                        | 0 (0%)        | n/a                                                            |
| Patient population                       |                       |                                                                |                                    |                                                                |               |                                                                |
| ARDS                                     | 32 (44%)              | 13 (41%)                                                       | 32 (82%)                           | 13 (41%)                                                       | 0 (0%)        | n/a                                                            |
| Normal                                   | 31 (42%)              | 24 (77%)                                                       | 0 (0%)                             | n/a                                                            | 31 (91%)      | 24 (77%)                                                       |
| Laparoscopic                             | 22 (30%)              | 17 (77%)                                                       | 0 (0%)                             | n/a                                                            | 22 (65%)      | 17 (77%)                                                       |
| Obese                                    | 4 (5%)                | 2 (50%)                                                        | 1 (3%)                             | 0 (0%)                                                         | 3 (9%)        | 2 (67%)                                                        |
| Postoperative                            | 3 (4%)                | 3 (100%)                                                       | 3 (8%)                             | 3 (100%)                                                       | 0 (0%)        | n/a                                                            |
| AHRF                                     | 2 (3%)                | 0 (0%)                                                         | 2 (5%)                             | 0 (0%)                                                         | 0 (0%)        | n/a                                                            |
| ECMO                                     | 2 (3%)                | 1 (50%)                                                        | 2 (5%)                             | 1 (50%)                                                        | 0 (0%)        | n/a                                                            |
| Mixed                                    | 2 (3%)                | 0 (0%)                                                         | 2 (5%)                             | 0 (0%)                                                         | 0 (0%)        | n/a                                                            |
| PEEP method                              |                       |                                                                |                                    |                                                                |               |                                                                |
| Compliance                               | 29 (40%)              | 15 (52%)                                                       | 10 (26%)                           | 2 (20%)                                                        | 19 (56%)      | 13 (68%)                                                       |
| PEEP-F <sub>I</sub> O <sub>2</sub> table | 21 (29%)              | 8 (38%)                                                        | 21 (54%)                           | 8 (38%)                                                        | 0 (0%)        | n/a                                                            |
| Oxygenation                              | 12 (16%)              | 5 (42%)                                                        | 9 (23%)                            | 2 (22%)                                                        | 3 (9%)        | 3 (100%)                                                       |
| Imaging-based                            | 11 (15%)              | 7 (64%)                                                        | 5 (13%)                            | 2 (40%)                                                        | 6 (18%)       | 5 (83%)                                                        |
| Esophageal probe                         | 11 (15%)              | 6 (55%)                                                        | 7 (18%)                            | 3 (43%)                                                        | 4 (12%)       | 3 (75%)                                                        |
| Driving pressure                         | 7 (10%)               | 6 (86%)                                                        | 1 (3%)                             | 1 (100%)                                                       | 6 (18%)       | 5 (83%)                                                        |
| Pressure-volume curves                   | 7 (10%)               | 5 (71%)                                                        | 7 (18%)                            | 5 (71%)                                                        | 0 (0%)        | n/a                                                            |
| Shunt                                    | 2 (3%)                | 1 (50%)                                                        | 2 (5%)                             | 1 (50%)                                                        | 0 (0%)        | n/a                                                            |
| Plateau pressure                         | 2 (3%)                | 0 (0%)                                                         | 2 (5%)                             | 0 (0%)                                                         | 0 (0%)        | n/a                                                            |
| Computer-based                           | 1 (1%)                | 1 (100%)                                                       | 1 (3%)                             | 1 (100%)                                                       | 0 (0%)        | n/a                                                            |
| EELV/FRC                                 | 1 (1%)                | 0 (0%)                                                         | 1 (3%)                             | 0 (0%)                                                         | 0 (0%)        | n/a                                                            |
| Primary outcomes                         |                       |                                                                |                                    |                                                                |               |                                                                |
| Physiologic                              | 39 (53%)              | 27 (69%)                                                       | 16 (41%)                           | 8 (50%)                                                        | 23 (68%)      | 19 (83%)                                                       |
| Oxygenation                              | 27 (37%)              | 20 (74%)                                                       | 12 (31%)                           | 7 (58%)                                                        | 15 (44%)      | 13 (87%)                                                       |
| Compliance                               | 12 (16%)              | 6 (75%)                                                        | 4 (10%)                            | 3 (75%)                                                        | 8 (24%)       | 6 (75%)                                                        |
| Mortality                                | 14 (19%)              | 5 (36%)                                                        | 14 (36%)                           | 5 (36%)                                                        | 0 (0%)        | n/a                                                            |
| Other                                    | 8 (11%)               | 7 (87.5%)                                                      | 4 (10%)                            | 3 (75%)                                                        | 4 (12%)       | 4 (100%)                                                       |
| Post-op complication                     | 6 (8%)                | 3 (50.0%)                                                      | 0 (0%)                             | n/a                                                            | 6 (18%)       | 3 (50%)                                                        |
| Ventilator-free days                     | 4 (5%)                | 0 (0.0%)                                                       | 4 (10%)                            | 0 (0%)                                                         | 0 (0%)        | n/a                                                            |
| Not reported                             | 2 (3%)                | n/a                                                            | 2 (5%)                             | n/a                                                            | 0 (0%)        | n/a                                                            |
| Duration of ventilation                  | 1 (1%)                | 0 (0.0%)                                                       | 1 (3%)                             | 0 (0%)                                                         | 0 (0%)        | n/a                                                            |

<sup>a</sup>Percentages are for total studies within given column

<sup>b</sup>Percentages are for total studies within given category

AHRF = hypoxemic respiratory failure; ARDS = acute respiratory distress syndrome; ECMO = extracorporeal membrane oxygenation; EELV = end-expiratory lung volume; FRC = functional residual capacity; ICU = intensive care unit; n/a = not applicable; OR = operating room; PEEP = positive end-expiratory pressure

**eTable 11** Clinical outcomes from randomized controlled trials

| Outcome                  | Overall ( <i>N</i> = 73), <i>n</i> (%) | Setting, <i>n</i> (%) <sup>a</sup> |                     |
|--------------------------|----------------------------------------|------------------------------------|---------------------|
|                          |                                        | ICU ( <i>N</i> = 39)               | OR ( <i>N</i> = 34) |
| Mortality                | 36 (49%)                               | 30 (77%)                           | 6 (18%)             |
| 28-day mortality         | 21 (29%)                               | 19 (49%)                           | 2 (6%)              |
| Hospital mortality       | 19 (26%)                               | 16 (41%)                           | 3 (9%)              |
| ICU mortality            | 15 (21%)                               | 15 (38%)                           | 0 (0%)              |
| 60-day mortality         | 8 (11%)                                | 8 (21%)                            | 0 (0%)              |
| 180-day mortality        | 6 (8%)                                 | 6 (15%)                            | 0 (0%)              |
| 90-day mortality         | 4 (5%)                                 | 3 (8%)                             | 1 (3%)              |
| Ventilation              | 48 (66%)                               | 30 (77%)                           | 18 (53%)            |
| Duration of ventilation  | 34 (47%)                               | 16 (41%)                           | 18 (53%)            |
| Vent-free days – 28 days | 16 (22%)                               | 16 (41%)                           | 0 (0%)              |
| % Vent-free – 28 days    | 3 (4%)                                 | 3 (8%)                             | 0 (0%)              |
| Vent-free days – 60 days | 1 (1%)                                 | 1 (3%)                             | 0 (0%)              |
| Length of stay           | 37 (51%)                               | 24 (62%)                           | 13 (38%)            |
| ICU LOS                  | 31 (42%)                               | 24 (62%)                           | 7 (21%)             |
| Hospital LOS             | 29 (40%)                               | 16 (41%)                           | 13 (38%)            |
| Safety                   | 52 (71%)                               | 28 (72%)                           | 24 (71%)            |
| Hemodynamic instability  | 36 (49%)                               | 12 (31%)                           | 24 (71%)            |
| Barotrauma               | 26 (36%)                               | 26 (67%)                           | 0 (0%)              |

<sup>a</sup>Percentages are for total studies within given column

ICU = intensive care unit; LOS = length of stay; OR = operating room

**eTable 12** List of citations that could not be translated or retrieved

1. *Abd-Elhalim S, Tawfik M, Moez K, Nabih GM.* The effects of alveolar recruitment maneuver using PEEP 20 during surgery for cancer oesophagus. *Egypt J Anaesth* 2006; 22: 291–8.
2. *Aksel'rod BA, Pshenichnyy TA, Titova IV.* Electrical impedance tomography of the lungs in the practice of the anesthesiologist. *Anesteziol Reanimatol* 2017; 62: 43–6.
3. *Blanch L, et al.* Effect of peep on the pulmonary mechanics and the expiratory capnogram in patients with chronic obstructive pulmonary disease under mechanical ventilation. [Spanish]. *Medicina Intensiva* 1995; 19: 304–12.
4. *Borelli M, et al.* The use of mixed venous saturation and percutaneous capillary saturation for determining the level of PEEP. *Minerva Anestesiologica* 1991; 57: 119–21.
5. *Cohendy R, et al.* Pressure-controlled mechanical ventilation: a simplified titration method of the extrinsic positive expiratory pressure. *Annales Francaises d Anesthesie et de Reanimation* 1998; 17: 1114–21.
6. *Di X, Li X, Hu Z.* Correlation between functional residual capacity and trans-pulmonary pressure in acute respiratory distress syndrome patients and their prognostic value. *Zhonghua Wei Zhong Bing Ji Jiu Yi Xue* 2020; 32: 166–70.
7. *Dostal P, Parizkova R, Cerny V.* Prediction of impact of end-expiratory pressure changes on pulmonary shunt fraction in patients with ARDS - The significance of estimated pulmonary recruitment. [Czech]. *Anesteziologie a Neodkladna Pece* 2002; 13: 220–6.
8. *Huang YZ, et al.* Effect of lung stress index upon titration of positive end-expiratory pressure at post-recruitment in patients with acute respiratory distress syndrome. *Chung-Hua i Hsueh Tsa Chih [Chinese Medical Journal]* 2009; 89: 2739–43.
9. *Jiarui H, Yang Z, Ju G.* Effects of driving pressure-guided individualized PEEP ventilation on intraoperative cardiac function in elderly patients undergoing laparoscopic surgery. *Chinese Journal of Anesthesiology* 2022; 42: 813–7.
10. *Kong W, et al.* The effects of extrinsic positive end-expiratory pressure on work of breathing in patients with chronic obstructive pulmonary disease. *Chung-Hua Nei Ko Tsa Chih Chinese Journal of Internal Medicine* 2001; 40: 385–9.
11. *Kram HB, et al.* Determination of optimal positive end-expiratory pressure by means of conjunctival oximetry. *Surgery* 1987; 101: 329–34.
12. *Labrousse J, et al.* Optimal positive end expiratory pressure in adult respiratory distress syndrome. *Revue Francaise des Maladies Respiratoires* 1979; 7: 61–3.
13. *Li J, et al.* Effect of different transpulmonary pressures guided mechanical ventilation on respiratory and hemodynamics of patients with ARDS: a prospective randomized controlled trial. *Zhonghua Wei Zhong Bing Ji Jiu Yi Xue* 2017; 29: 39–44.
14. *Li J, et al.* Determination of individualized PEEP during lung-protective ventilation in patients undergoing general anesthesia: comparison of pulmonary electrical impedance tomography and dynamic lung compliance. *Chinese Journal of Anesthesiology* 2021; 41: 72–5.

15. *Li Y, et al.* The value of nitrogen washout/washin method in assessing alveolar recruitment volume in acute lung injury patients. *Chung-Hua Nei Ko Tsa Chih Chinese Journal of Internal Medicine* 2013; 52: 295–8.
16. *Liu SQ, et al.* Dead space guided positive end-expiratory pressure in patients with acute respiratory distress syndrome. *Chung-Hua Nei Ko Tsa Chih Chinese Journal of Internal Medicine* 2011; 50: 926–30.
17. *Long Y, et al.* Positive End-expiratory Pressure Titration after Alveolar Recruitment Directed by Electrical Impedance Tomography. *Chinese Medical Journal* 2015; 128: 1421–7.
18. *Long Y, et al.* The application of individualized ventilation strategies in acute respiratory distress syndrome. *Chung-Hua Chieh Ho Ho Hu Hsi Tsa Chih Chinese Journal of Tuberculosis & Respiratory Diseases* 2006; 29: 549–53.
19. *Nishimura N, et al.* PEEP on cardiovascular system. [Japanese]. *Japanese Journal of Anesthesiology* 1978; 27: 1549–58.
20. *Pasculli M, et al.* Optimization of PEEP levels in the treatment of ARDS by means of monitoring the atrial mixed venous oxygen saturation. *Minerva Anestesiologica* 1991; 57: 89–91.
21. *Qiu H, Zhou S, Guo F.* Dynamic pressure-volume curve predicts the optimal positive end-expiratory pressure in patients with acute respiratory distress syndrome. *Chung-Hua Nei Ko Tsa Chih Chinese Journal of Internal Medicine*; 2001; 40: 621–4.
22. *Qiu HB.* Titration of the optimal positive end-expiratory pressure and its prognostic value in acute respiratory distress syndrome. *Chung-Hua Chieh Ho Ho Hu Hsi Tsa Chih Chinese Journal of Tuberculosis & Respiratory Diseases* 2007; 30: 733–7.
23. *Ruchina EV, et al.* Assessment of lung functional residual capacity and oxygen consumption during PEEP trial procedure. *Anesteziology i Reanimatologiya* 2013; 3: 51–4.
24. *Ruiz Ferron, F., et al.,* Effect of PEEP on the mechanics of respiratory system in patients with acute hypoxemic respiratory failure. [Spanish]. *Medicina Intensiva*, 1999. 23: p. 145-153.
25. *Stefanov C. et al.* Optimization of mechanical ventilation parameters in patients with respiratory distress syndrome. [Bulgarian]. *Anaesthesiology and Intensive Care* 2002; 29: 70–4.
26. *Spatenkova V, Kuriscak E, Mlcek M.* Standard versus individual positive end-expiratory pressure (PEEP) by electrical impedance tomography in neurocritical care: a pilot prospective study. *Intensive Care Medicine Experimental* 2022; 10.
27. *Tenaillon A, et al.* Critical study of the different concepts of optimal positive end-expiration pressure (PEEP). *Annales de l'Anesthesiologie Francaise* 1981; 22: 443–9.
28. *Wang Z, Zhu J, Yao J.* Effect of driving pressure-guided individualized PEEP titration on atelectasis in elderly patients undergoing robot-assisted radical prostatectomy. *Chinese Journal of Anesthesiology* 2021; 41: 1446–50.
29. *Wu Q, et al.* Effects of positive end-expiratory pressure setting of mechanical ventilation guided by esophageal pressure in the treatment of patients with traumatic craniocerebral injury combined with acute respiratory distress syndrome. *Zhonghua Shao Shang Za Zhi* 2021; 37: 446–52.



30. Wu X, et al. Transpulmonary pressure guided optimal positive end-expiratory pressure selection in patients with acute respiratory distress syndrome. *Zhonghua wei zhong bing ji jiu yi xue* 2016; 28: 801–6.
31. Xingwei D, Xiaodong L, Zhansheng H. Correlation between functional residual capacity and trans-pulmonary pressure in acute respiratory distress syndrome patients and their prognostic value. [Chinese]. *Zhonghua Wei Zhong Bing Ji Jiu Yi Xue [Chinese Crit Care Med]* 2020; 32: 166–70.
32. Xu L, et al. Clinical research of using optimal compliance to determine positive end-expiratory pressure. *Zhongguo Wei Zhong Bing Ji Jiu Yi Xue/Chinese Critical Care Medicine/Zhongguo Weizhongbing Jijiuyixue* 2012; 24: 393–7.
33. Yaroshetskiy AI, et al. Positive end-expiratory pressure adjustment in parenchymal respiratory failure: static pressure-volume loop or transpulmonary pressure? *Anesteziologiya i Reanimatologiya* 2014; 59: 53–9.
34. Yaroshetskiym AI, et al. Optimum Level of Positive End-Expiratory Pressure in Acute Respiratory Distress Syndrome Caused by Influenza a(H1ni)Pdm09: Balance between Maximal End-Expiratory Volume and Minimal Alveolar Overdistension. *Anesteziologiya i Reanimatologiya* 2016; 61: 425–32.
35. Yin WP, et al. Effect of recruitment maneuver on acute respiratory distress syndrome. *Chinese Journal of Emergency Medicine* 2013; 22: 409–13.
36. Zhihan L, et al. Clinical application of adaptive minute ventilation + IntelliCycle ventilation mode in patients with mild-to-moderate acute respiratory distress syndrome. [Chinese]. *Zhonghua Wei Zhong Bing Ji Jiu Yi Xue* 2020; 32: 20–5.
37. Zhu J, Yao J, Wang Z. Effect of driving pressure-guided PEEP titration on lung injury in elderly patients undergoing robot-assisted radical prostatectomy. *Chinese Journal of Anesthesiology* 2022; 42: 39–43.

**eFig. 1** Articles studying methods of determining optimal positive end-expiratory pressure published by five-year interval

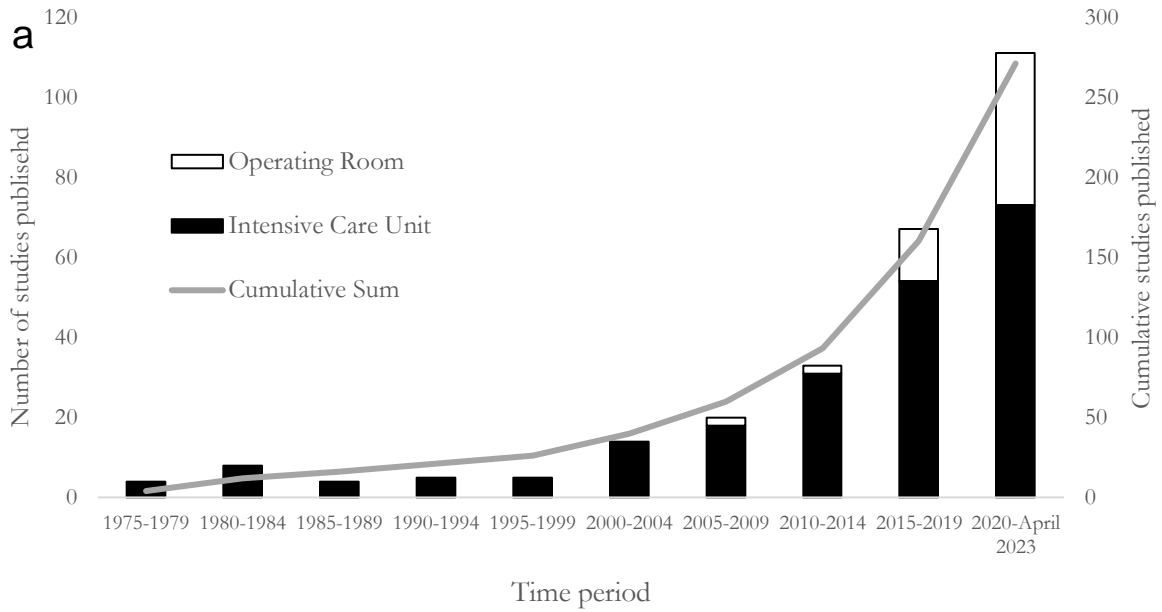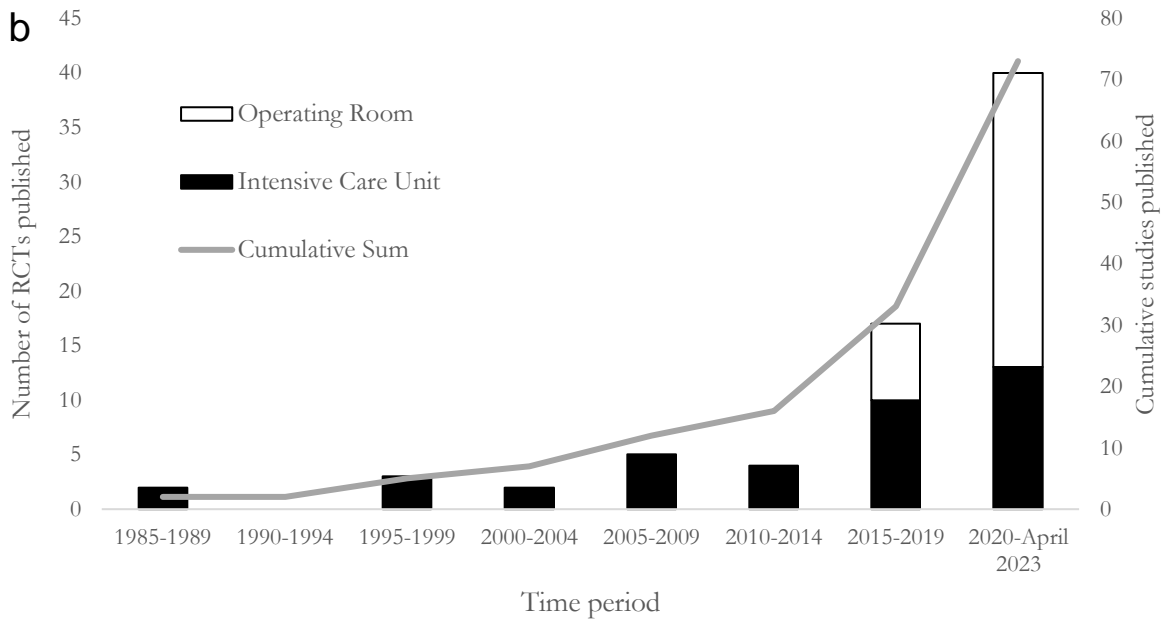

a) overall and b) randomized controlled trials

RCT = randomized controlled trial

**eFig. 2** Number of studies assessing methods of determining optimal positive end expiratory pressure published by five-year time period

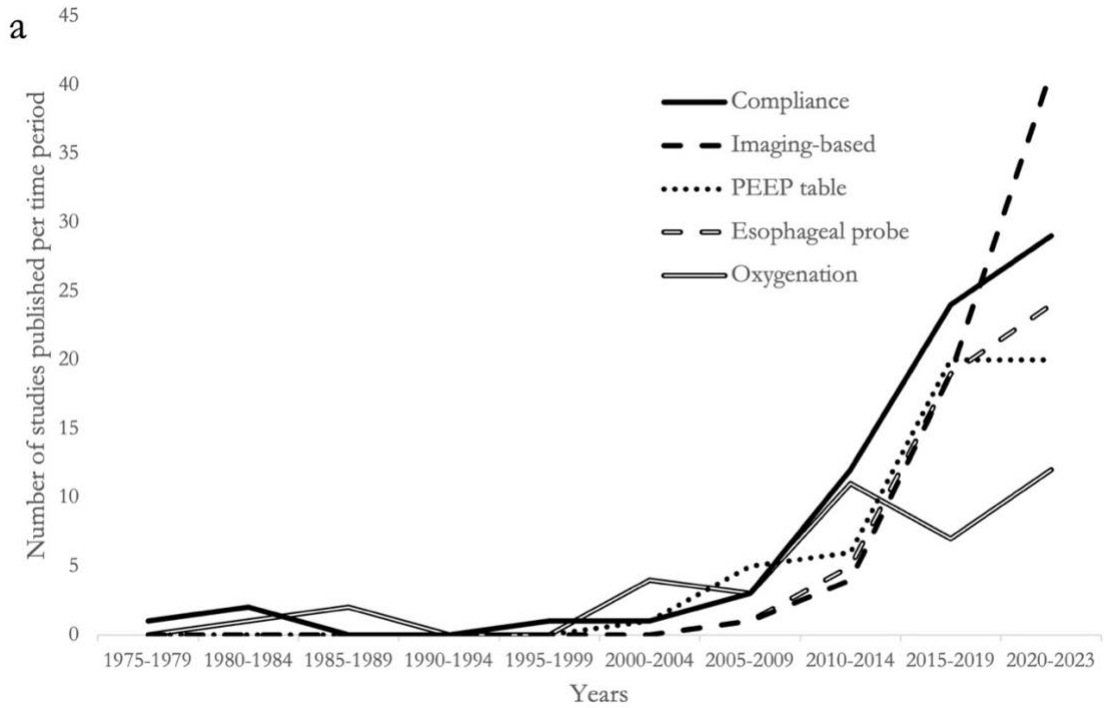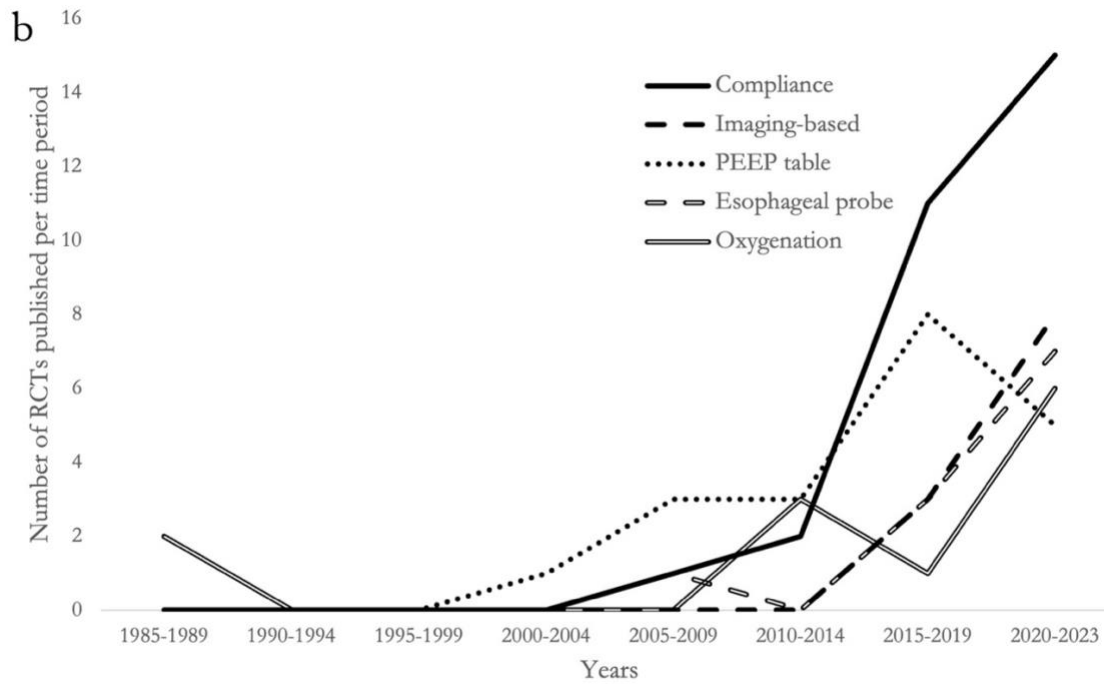

Stratified by method a) overall number of studies published b) randomized controlled trials published

PEEP = positive end-expiratory pressure

**eFig. 3** Number of participants in randomized controlled trials assessing methods of determining optimal positive end-expiratory pressure

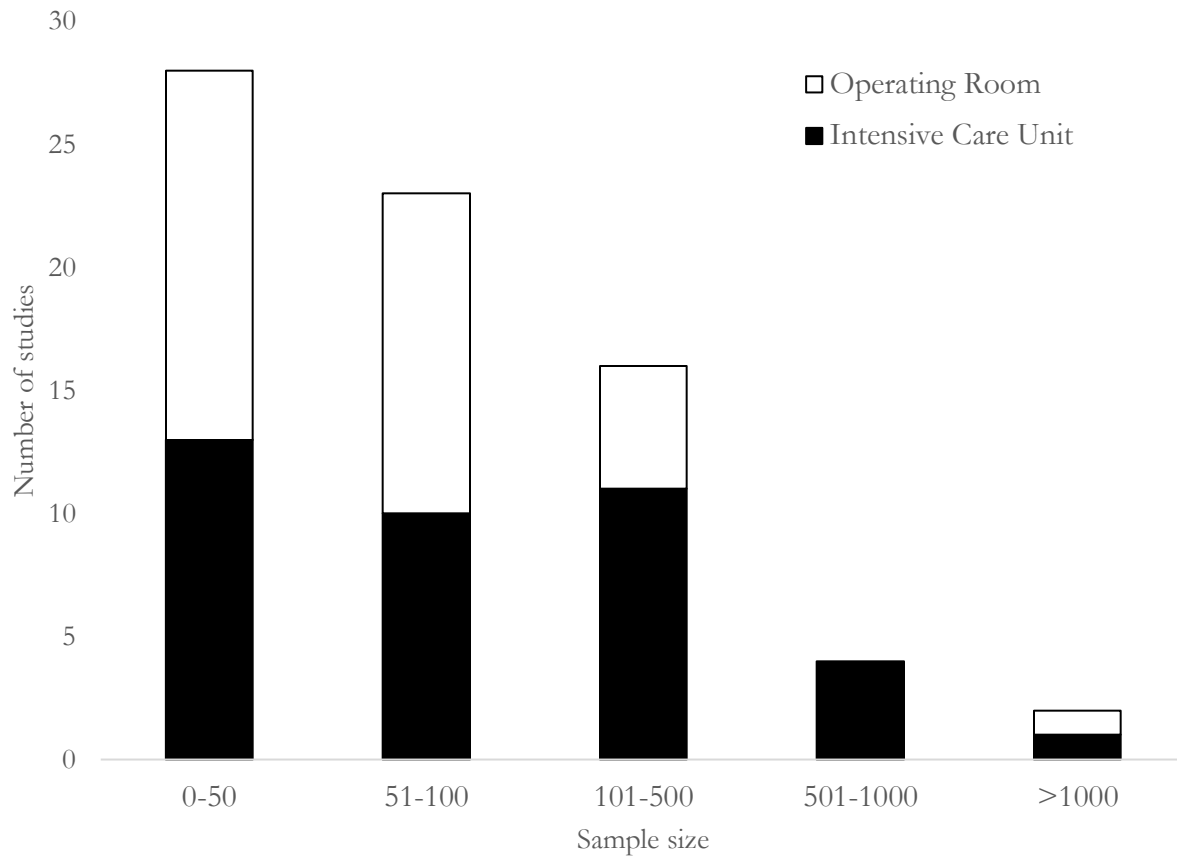

Stratified by intensive care unit or operating room setting

## References

1. *Abu-Khabar H, Elsayed A, Ahmad M.* Correlation between PCO<sub>2</sub> (arterial-endtidal) gradient and positive end expiratory pressure titration in mechanically ventilated patients with acute lung injury or acute respiratory distress syndrome. *J Am Sci* 2011; 7: A224.
2. *Abutbul A, Sviru S, Zbedat W, Linton DM, Van Heerden PV.* A prospective comparison of the efficacy and safety of fully closed-loop control ventilation (Intellivent-ASV) with conventional ASV and SIMV modes. *South African J Crit Care* 2014; 30: 28–32.
3. *Acar Cinleti B, Ediboglu O, Kirakli C.* Can we titrate PEEP more accurately according to transpulmonary pressures in overweight and obese patients ? *Intensive Care Medicine Experimental Conference: 32nd European Society of Intensive Care Medicine Annual Congress, ESICM 2019*; 7.
4. *Al Masry A, Boules ML, Boules NS, Ebied RS.* Optimal method for selecting PEEP level in ALI/ARDS patients under mechanical ventilation. *J Egypt Soc Parasitol* 2012; 42: 359–72.
5. *Albaiceta GM, Luyando LH, Parra D, et al.* Inspiratory vs. expiratory pressure-volume curves to set end-expiratory pressure in acute lung injury. *Intensive Care Med* 2005; 31: 1370–8.
6. *Algera AG, Pisani L, Serpa Neto A, et al.* Effect of a lower vs higher positive end-expiratory pressure strategy on ventilator-free days in ICU patients without ARDS: a randomized clinical trial. *JAMA* 2020; 324: 2509–20.
7. *Amato MB, Barbas CS, Medeiros DM, et al.* Effect of a protective-ventilation strategy on mortality in the acute respiratory distress syndrome. *N Engl J Med* 1998; 338: 347–54.
8. *Anderson JR, East TD.* A closed-loop controller for mechanical ventilation of patients with ARDS. *Biomed Sci Instrument* 2002; 38: 289–94.
9. *Antonin C, Dara C, Bertr P, et al.* Physiological effects of positive end-expiratory pressure titration strategies based on electrical impedance tomography in patients with COVID-19 associated acute respiratory distress syndrome. *Ann Intensive Care* 2022; 12.
10. *Arellano D, Cornejo RA, Lazo M.* Effects of support pressure and peep on the asynchrony index evaluated by electrical impedance tomography in mechanically ventilated critical patients of a university hospital. *Am J Respir Crit Care Med* 2019; 199.
11. *Arellano D, Lazo M, Guinez D, et al.* Effects of setting bestpeep V/s peep 5 on pulmonary mechanic and recruitment in ARDS patients, monitored by electrical impedance tomography (EIT) and computed tomography (CT): preliminary report. *Am J Respir Crit Care Med* 2019; 199.
12. *Arnal JM, Wysocki M, Novotni D, et al.* Safety and efficacy of a fully closed-loop control ventilation (IntelliVent-ASV(R)) in sedated ICU patients with acute respiratory failure: a prospective randomized crossover study. *Intensive Care Med* 2012; 38: 78187.

13. *Arnal JM, Garnero A, Novonti D, et al.* Feasibility study on full closed-loop control ventilation (IntelliVent-ASV TM) in ICU patients with acute respiratory failure: a prospective observational comparative study. *Crit Care* 2013; 17: R196.
14. *Arnal JM, Saoli M, Garnero A.* Airway and transpulmonary driving pressures and mechanical powers selected by INTELLiVENT-ASV in passive, mechanically ventilated ICU patients. *Heart Lung* 2019; 49: 427–34.
15. *Asar S, Tulubas EK, Sabaz MS, Acicbe O.* The effect of PEEP adjusted by automatic recruitment maneuver on total and dynamic mechanical power in Bariatric surgery. *Med J Bakirkoy* 2021; 17: 262–7.
16. *Badet M, Bayle F, Richard JC, Guerin C.* Comparison of optimal positive end-expiratory pressure and recruitment maneuvers during lung-protective mechanical ventilation in patients with acute lung injury/acute respiratory distress syndrome. *Respir Care* 2009; 54: 847–54.
17. *Baedorf Kassis E, Loring SH, Talmor D.* Mortality and pulmonary mechanics in relation to respiratory system and transpulmonary driving pressures in ARDS. *Intensive Care Med* 2016; 42: 1206–13.
18. *Bagheri Moghaddam A, Khors, M., Amini S.* Ultrasonographic assessment of lung recruitment with two different positive end-expiratory pressure strategies in moderate to severe acute respiratory distress syndrome. *Intensive Care Medicine Experimental Conference: 31st European Society of Intensive Care Medicine Annual Congress, ESICM 2018*; 6.
19. *Becher T, Kott M, Schadler D, et al.* Influence of tidal volume on ventilation inhomogeneity assessed by electrical impedance tomography during controlled mechanical ventilation. *Physiol Meas* 2015; 36: 1137–46.
20. *Becher T, Buchholz V, Hassel D, et al.* Individualization of PEEP and tidal volume in ARDS patients with electrical impedance tomography: a pilot feasibility study. *Ann Intensive Care* 2021; 11: 89.
21. *Beitler JR, Sarge T, Banner-Goodspeed VM, et al.* Effect of titrating positive end-expiratory pressure (PEEP) with an esophageal pressure-guided strategy vs an empirical high PEEP-Fio2 strategy on death and days free from mechanical ventilation among patients with acute respiratory distress syndrome: a randomized clinical trial. *JAMA* 2019; 321: 846–57.
22. *Berg J, Massion P, Lambermont B, Parzibut G, Samalea N, Ledoux D.* Transpulmonary pressures with an air-filled esophageal catheter. *Intensive Care Med Exp* 2021; 9.
23. *Bergamini BC, Medeiros D, Bozza F, Giannella-Neto A, Carvalho AR.* Comparison of two strategies to set positive end-expiratory pressure during a decremental trial. *Intensive Care Med* 2010; 2: S216.
24. *Bergez M, Fritsch N, Tran-Van D, et al.* PEEP titration in moderate to severe ARDS: plateau versus transpulmonary pressure. *Ann Intensive Care* 2019; 9.

25. *Bersten AD.* Measurement of overinflation by multiple linear regression analysis in patients with acute lung injury. *Eur Respir J* 1998; 12: 526–32.
26. *Bime C, Fiero M, Lu Z, et al.* High positive end-expiratory pressure is associated with improved survival in obese patients with acute respiratory distress syndrome. *Am J Med* 2016; 130: 207–13.
27. *Bito K, Shono A, Kimura S, et al.* Clinical implications of determining individualized positive end-expiratory pressure using electrical impedance tomography in post-cardiac surgery patients: a prospective, non-randomized interventional study. *J Clin Med* 2022; 11: 3022.
28. *Blanch L, Fernandez R, Benito S, Mancebo J, Net A.* Effect of PEEP on the arterial minus end-tidal carbon dioxide gradient. *Chest* 1987; 92: 451–4.
29. *Blankman P, Shono A, Hermans BJ, Wesselius T, Hasan D, Gommers D.* Detection of optimal PEEP for equal distribution of tidal volume by volumetric capnography and electrical impedance tomography during decreasing levels of PEEP in post cardiac-surgery patients. *Br J Anaesth* 2016; 116: 862–9.
30. *Blecha S, Hager A, Gross V, et al.* Effects of individualised high positive end-expiratory pressure and crystalloid administration on postoperative pulmonary function in patients undergoing robotic-assisted radical prostatectomy: a prospective randomised single-blinded pilot study. *J Clin Med* 2023; 12: 1460.
31. *Boesing C, Graf PT, Schmitt F, et al.* Effects of different positive end-expiratory pressure titration strategies during prone positioning in patients with acute respiratory distress syndrome: a prospective interventional study. *Crit Care* 2022; 26: 82.
32. *Brault C, Zerbib Y, Kontar L, Carpentier M, Maizel J, Slama M.* Positive end-expiratory pressure in COVID-19-related ARDS: do not forget the airway closure. *J Crit Care* 2021; 64: 141–3.
33. *Bronco A, Grassi A, Meroni V, et al.* Clinical value of electrical impedance tomography (EIT) in the management of patients with acute respiratory failure: a single centre experience. *Physiol Meas* 2021; 42: 28.
34. *Brower RG, Lanken PN, MacIntyre N, et al.* Higher versus lower positive end-expiratory pressures in patients with the acute respiratory distress syndrome. *N Engl J Med* 2004; 351: 327–36.
35. *Buiteman-Kruizinga LA, Mkadmi HE, Neto AS, et al.* Effect of intellivent-asv versus conventional ventilation on ventilation intensity in patients with COVID-19 ARDS—an observational study. *J Clin Med* 2021; 10: 5409.
36. *Buiteman-Kruizinga LA, Tsonas AM, Botta M, et al.* The effect of INTELLiVENT-ASV on oxygenation, FiO<sub>2</sub> and PEEP in critically ill invasively ventilated patients. *Intensive Care Med* 2022; 10.

37. *Cammarota G, Lauro G, Sguazzotti I, et al.* Esophageal pressure versus gas exchange to set PEEP during intraoperative ventilation. *Respir Care* 2020; 65: 625–35.
38. *Carroll GC, Tuman KJ, Braverman B, et al.* Minimal positive end-expiratory pressure (PEEP) may be "best PEEP." *Chest* 1988; 93: 1020–5.
39. *Carvalho CR, Barbas CS, Medeiros DM, et al.* Temporal hemodynamic effects of permissive hypercapnia associated with ideal PEEP in ARDS. *Am J Respir Crit Care Med* 1997; 156: 1458–66.
40. *Casserty B, McCool FD, Saunders J, Selvakumar N, Levy MM.* End-expiratory volume and oxygenation: targeting PEEP in ARDS patients. *Lung* 2015; 194: 35–41.
41. *Cavalcanti AB, Suzumura EA, Laranjeira LN, et al.* Effect of lung recruitment and titrated positive end-expiratory pressure (PEEP) vs low PEEP on mortality in patients with acute respiratory distress syndrome—a randomized clinical trial. *JAMA* 2017; 318: 1335–45.
42. *Ceruti S, Roncador M, Saporito A, et al.* Low PEEP mechanical ventilation and PaO<sub>2</sub>/FiO<sub>2</sub> ratio evolution in COVID-19 patients. *SN Compr Clin Med* 2021; 3: 2435–42.
43. *Chiew YS, Chase JG, Shaw GM, Sundaresan A, Desai T.* Model-based PEEP optimisation in mechanical ventilation. *Biomed Eng Online* 2011; 10: 111.
44. *Chiew YS, Pretty CG, Shaw GM, et al.* Feasibility of titrating PEEP to minimum elastance for mechanically ventilated patients. *Pilot Feasibility Stud* 2015; 1: 9.
45. *Chimot L, Fedun Y, Gacouin A, et al.* Optimization of positive end-expiratory pressure targeting the best arterial oxygen transport in the acute respiratory distress syndrome: the OPTIPEPsStudy. *ASAIO J* 2017; 63: 450–5.
46. *Chiumello D, Cressoni M, Carlesso E, et al.* Bedside selection of positive end-expiratory pressure in mild, moderate, and severe acute respiratory distress syndrome. *Crit Care Med* 2014; 42: 252–64.
47. *Chiumello D, Bonifazi M, Pozzi T, et al.* Positive end-expiratory pressure in COVID-19 acute respiratory distress syndrome: the heterogeneous effects. *Crit Care* 2021; 25: 431.
48. *Cinnella G, Grasso S, Raimondo P, et al.* Physiological effects of the open lung approach in patients with early, mild, diffuse acute respiratory distress syndrome: an electrical impedance tomography study. *Anesthesiology* 2015; 123: 1113–21.
49. *Cole AG, Weller SF, Sykes MK.* Inverse ratio ventilation compared with PEEP in adult respiratory failure. *Intensive Care Med* 1984; 10: 227–32.
50. *Constantin JM, Jabaudon M, Lefrant JY, et al.* Personalised mechanical ventilation tailored to lung morphology versus low positive end-expiratory pressure for patients with acute respiratory distress syndrome in France (the LIVE study): a multicentre, single-blind, randomised controlled trial. *Lancet Respir Med* 2019; 7: 870–80.



51. *Cylwik J, Buda N.* Lung ultrasonography in the monitoring of intraoperative recruitment maneuvers. *Diagnostics* 2021; 11: 10.
52. *D'Antini D, Rauseo M, Grasso S, et al.* Physiological effects of the open lung approach during laparoscopic cholecystectomy: focus on driving pressure. *Minerva Anesthesiol* 2017; 84: 159–67.
53. *da Cruz MR, Camilo LM, da Costa Xavier TB, et al.* Positive end-expiratory pressure induced changes in airway driving pressure in mechanically ventilated COVID-19 acute respiratory distress syndrome patients. *Crit Care* 2023; 27: 118.
54. *Damien V, Nadia A, Amelie CC, et al.* Transpulmonary pressures measurements as a mean to optimize mechanical ventilation in a unique series of patients combining ARDS and very severe morbid obesity. *Ann Intensive Care* 2018; 8.
55. *Dara C, Antonin C, Bertr P, et al.* Comparison of positive end-expiratory pressure titration strategies based on measured end-expiratory transpulmonary pressure and calculated end-inspiratory transpulmonary pressure in acute respiratory distress syndrome: a physiological study. *Ann Intensive Care* 2022; 12.
56. *Dargvainis M, Ohnesorge H, Schadler D, Alkatout I, Frerichs I, Becher T.* Recrutable alveolar collapse and overdistension during laparoscopic gynecological surgery and mechanical ventilation: a prospective clinical study. *BMC Anesthesiol* 2022; 22: 251.
57. *de Matos GF, Stanzani F, Passos RH, et al.* How large is the lung recruitability in early acute respiratory distress syndrome: a prospective case series of patients monitored by computed tomography. *Crit Care* 2012; 16: R4.
58. *De Santis Santiago R:* High pleural pressure prevents alveolar overdistension and hemodynamic collapse in ARDS with class III obesity. *Am J Respir Crit Care Med* 2021.
59. *Depta F, Euliano NR, Zdravkovic M, Torok P, Gentile MA.* Time constant to determine PEEP levels in mechanically ventilated COVID-19 ARDS: a feasibility study. *BMC Anesthesiol* 2022; 22: 387.
60. *Depta F, Torok P, Miller A, et al.* Programmed multi-level ventilation in COVID-19-related acute respiratory distress syndrome: a multi-center retrospective observational study. *J Int Med Res* 2022; 50: 3000605221101970.
61. *Di Pierro M, Giani M, Bronco A, et al.* Bedside selection of positive end expiratory pressure by electrical impedance tomography in patients undergoing veno-venous extracorporeal membrane oxygenation support: a comparison between COVID-19 ARDS and ARDS from other etiologies. *J Clin Med* 2022; 11.
62. *Dianti J, Fard S, Wong J, et al.* Strategies for lung- and diaphragm-protective ventilation in acute hypoxemic respiratory failure: a physiological trial. *Crit Care* 2022; 26: 259.

63. *Douglas ME, Downs JB.* Pulmonary function following severe acute respiratory failure and high levels of positive end-expiratory pressure. *Chest* 1977; 71: 18–23.
64. *Dyhr T, Laursen N, Larsson A.* Effects of lung recruitment maneuver and positive end-expiratory pressure on lung volume, respiratory mechanics and alveolar gas mixing in patients ventilated after cardiac surgery. *Acta Anaesthesiol Scand* 2002; 46: 717–25.
65. *Eichler L, Truskowska K, Dupree A, Busch P, Goetz AE, Zollner C.* Intraoperative ventilation of morbidly obese patients guided by transpulmonary pressure. *Obes Surg* 2018; 28: 122–9.
66. *Elshazly M, Khair T, Bassem M, Mansour M.* The use of intraoperative bedside lung ultrasound in optimizing positive end expiratory pressure in obese patients undergoing laparoscopic bariatric surgeries. *Surg Obes Rel Dis* 2021; 17: 372–8.
67. *Erlandsson K, Odenstedt H, Lundin S, Stenqvist O.* Positive end-expiratory pressure optimization using electric impedance tomography in morbidly obese patients during laparoscopic gastric bypass surgery. *Acta Anaesthesiol Scand* 2006; 50: 833–9.
68. *Ernest E, Bhattacharjee S, Baidya DK, et al.* Effect of incremental PEEP titration on postoperative pulmonary complications in patients undergoing emergency laparotomy: a randomized controlled trial. *Intensive Care Med Exp* 2022; 10.
69. *Eronia N, Mauri T, Maffezzini E, et al.* Bedside selection of positive end-expiratory pressure by electrical impedance tomography in hypoxemic patients: a feasibility study. *Ann Intensive Care* 2017; 7: 76.
70. *Estoos EM, Jocham KP, Zhang C, Benson LM, Milas A, Zakhary B.* Optimal positive end-expiratory pressure reduces right ventricular dysfunction in COVID-19 patients on venovenous extracorporeal membrane oxygenation: a retrospective single-center study. *J Crit Care* 2023; 75: 154274.
71. *Falde S, Gali B, Brown D, et al.* Mechanical Ventilation guided by transpulmonary and airway driving pressures in the setting of intraabdominal hypertension. *Chest* 2020; 157: A379.
72. *Fellahi JL, Valtier B, Beauchet A, Bourdarias JP, Jardin F.* Does positive end-expiratory pressure ventilation improve left ventricular function? A comparative study by transesophageal echocardiography in cardiac and noncardiac patients. *Chest* 1998; 114: 556–62.
73. *Fengmei G, Jin C, Songqiao L, Congshan Y, Yi Y.* Dead space fraction changes during PEEP titration following lung recruitment in patients with ARDS. *Respir Care* 2012; 57: 1578–85.
74. *Fernandez Mondejar E, Vazquez Mata G, et al.* Increase in lung volume originated by extrinsic PEEP in patients with auto-PEEP. The role of static lung compliance. *Intensive Care Med* 1992; 18: 269–73.

75. *Fernandez-Bustamante A, Sprung J, Parker RA, et al.* Individualized PEEP to optimise respiratory mechanics during abdominal surgery: a pilot randomised controlled trial. *Br J Anaesth* 2020; 125: 383–92.
76. *Ferrando C, Suarez-Sipmann F, Tusman G, et al.* Open lung approach versus standard protective strategies: effects on driving pressure and ventilatory efficiency during anesthesia—a pilot, randomized controlled trial. *PLoS One* 2017; 12: e0177399.
77. *Ferrando C, Tusman G, Suarez-Sipmann F, et al.* Individualized lung recruitment maneuver guided by pulse-oximetry in anesthetized patients undergoing laparoscopy: a feasibility study. *Acta Anaesthesiol Scand* 2018; 62: 608–19.
78. *Ferrando C, Soro M, Unzueta C, et al.* Individualised perioperative open-lung approach versus standard protective ventilation in abdominal surgery (iPROVE): a randomised controlled trial. *Lancet Respir Med* 2018; 6: 193–203.
79. *Florio G, Ferrari M, Bittner EA, et al.* A lung rescue team improves survival in obesity with acute respiratory distress syndrome. *Crit Care* 2020; 24: 4.
80. *Franchineau G, Brechot N, Lebreton G, et al.* Bedside contribution of electrical impedance tomography to setting positive end-expiratory pressure for extracorporeal membrane oxygenation-treated patients with severe acute respiratory distress syndrome. *Am J Respir Crit Care Med* 2017; 196: 447–57.
81. *Franchineau G, Brechot N, Hekimian G, et al.* Prone positioning monitored by electrical impedance tomography in patients with severe acute respiratory distress syndrome on veno-venous ECMO. *Ann Intensive Care* 2020; 10.
82. *Fumagalli J, Santiago RR, Teggia Droghi M, et al.* Lung recruitment in obese patients with acute respiratory distress syndrome. *Anesthesiology* 2019; 130: 791–803.
83. *Gallagher TJ, Civetta JM.* Goal-directed therapy of acute respiratory failure. *Anesth Analg* 1980; 59: 831–4.
84. *Gao L, Yang L, Pan L, Cui Y, Zhang J.* Optimal positive end-expiratory pressure obtained with titration of a fraction of inspiratory oxygen: a randomized controlled clinical trial. *Ann Transl Med* 2023; 11: 111205.
85. *Gernoth C, Wagner G, Pelosi P, Luecke T.* Respiratory and haemodynamic changes during decremental open lung positive end-expiratory pressure titration in patients with acute respiratory distress syndrome. *Crit Care* 2009; 13: R59.
86. *Gibot S, Conrad M, Courte G, Cravoisy A.* Positive end-expiratory pressure setting in COVID-19-related acute respiratory distress syndrome: comparison between electrical impedance tomography, PEEP/FiO<sub>2</sub> tables, and transpulmonary pressure. *Front Med* 2021; 8: 720920.

87. *Gil Cano AG, Garcia MI, Romero MG, Monrove JC.* Incidence, characteristics and outcome of barotrauma during open lung ventilation. *Med Intensiva* 2012; 36: 335–42.
88. *Girgis K, Hamed H, Khater Y, Kacmarek RM.* A decremental PEEP trial identifies the PEEP level that maintains oxygenation after lung recruitment. *Respir Care* 2006; 51: 1132–9.
89. *Girrbach F, Petroff D, Schulz S, et al.* Individualised positive end-expiratory pressure guided by electrical impedance tomography for robot-assisted laparoscopic radical prostatectomy: a prospective, randomised controlled clinical trial. *Br J Anaesth* 2020; 125: 373–82.
90. *Girrbach F, Zeutschel F, Schulz S, et al.* Methods for determination of individual PEEP for intraoperative mechanical ventilation using a decremental PEEP trial. *J Clin Med* 2022; 11.
91. *Glerant JC, Leleu O, Rose D, Mayeux I, Jounieaux V.* Oxygen consumption and PEEPe in ventilated COPD patients. *Respir Physiol Neurobiol* 2005; 146: 117–24.
92. *Goligher EC, Kavanagh BP, Rubenfeld GD, et al.* Oxygenation response to positive end-expiratory pressure predicts mortality in acute respiratory distress syndrome. A secondary analysis of the LOVS and ExPress trials. *Am J Respir Crit Care Med* 2014; 190: 70–6.
93. *Grasso S, Fanelli V, Cafarelli A, et al.* Effects of high versus low positive end-expiratory pressures in acute respiratory distress syndrome. *Am J Respir Crit Care Med* 2005; 171: 1002–8.
94. *Grasso S, Stripoli T, De Michele M, et al.* ARDSnet ventilatory protocol and alveolar hyperinflation: role of positive end-expiratory pressure. *Am J Respir Crit Care Med* 2007; 176: 761–7.
95. *Grasso S, Terragni P, Birocco A, et al.* ECMO criteria for influenza A (H1N1)-associated ARDS: role of transpulmonary pressure. *Intensive Care Med* 2012; 38: 395–403.
96. *Grasso S, Mirabella L, Murgolo F, et al.* Effects of positive end-expiratory pressure in "high compliance" severe acute respiratory syndrome coronavirus 2 acute respiratory distress syndrome. *Crit Care Med* 2020; 48: e1332–6.
97. *Grivans C, Stenqvist O.* Gas distribution by EIT during PEEP inflation: PEEP response and optimal PEEP with lowest trans-pulmonary driving pressure can be determined without esophageal pressure during a rapid PEEP trial in patients with acute respiratory failure. *Physiol Meas* 2022; 43.
98. *Guerin C, Dur GP, Pereira C, et al.* Effects of inhaled fenoterol and positive end-expiratory pressure on the respiratory mechanics of patients with chronic obstructive pulmonary disease. *Can Respir J* 2005; 12: 329–35.
99. *Guervilly C, Fournier T, Chommeloux J, et al.* Ultra-lung-protective ventilation and biotrauma in severe ARDS patients on veno-venous extracorporeal membrane oxygenation: a randomized controlled study. *Crit Care* 2022; 26: 383.

100. *Halawa NM, Elshafie MA, Fernandez JG, Metwally AA, Yassen KA.* Respiratory and hemodynamic effects of prophylactic alveolar recruitment during liver transplant: a randomized controlled trial. *Exper Clin Transplant* 2021; 19: 462–72.
101. *Hamama KM, Fathy SM, AbdAlrahman RS, Alsherif SE, Ahmed SA.* Driving pressure-guided ventilation versus protective lung ventilation in ARDS patients: a prospective randomized controlled study. *Egypt J Anaesth* 2021; 37: 261–7.
102. *Hata JS, Simmons JS, Kumar AB, et al.* The acute effectiveness and safety of the constant-flow, pressure-volume curve to improve hypoxemia in acute lung injury. *J Intensive Care Med* 2012; 27: 119–27.
103. *He X, Jiang J, Liu Y, et al.* Electrical impedance tomography-guided PEEP titration in patients undergoing laparoscopic abdominal surgery. *Medicine* 2016; 95: e3306.
104. *He H, Chi Y, Yang Y, et al.* Early individualized positive end-expiratory pressure guided by electrical impedance tomography in acute respiratory distress syndrome: a randomized controlled clinical trial. *Crit Care* 2021; 25: 230.
105. *Heines SJ, Strauch U, van de Poll MC, Roekaerts P, Bergmans D.* Clinical implementation of electric impedance tomography in the treatment of ARDS: a single centre experience. *J Clin Monit Comput* 2018; 33: 291–300.
106. *Heines SJ, de Jongh SA, Strauch U, van der Horst IC, van de Poll MC, Bergmans DC.* The global inhomogeneity index assessed by electrical impedance tomography overestimates PEEP requirement in patients with ARDS: an observational study. *BMC Anesthesiol* 2022; 22: 258.
107. *Heines SJ, van Bussel BC, Jong MJ, et al.* Pulmonary pathophysiology development of COVID-19 assessed by serial Electrical Impedance Tomography in the MaastrICht cohort. *Sci Rep* 2022; 12: 14517.
108. *Herrmann J, Talmor DS, Loring SH, Kaczka DW.* Nonlinear elastic distortion in acute lung injury: effects of ventilation strategy. *Am J Respir Crit Care Med* 2013; 187.
109. *Hodgson CL, Tuxen DV, Davies AR, et al.* A randomised controlled trial of an open lung strategy with staircase recruitment, titrated PEEP and targeted low airway pressures in patients with acute respiratory distress syndrome. *Crit Care* 2011; 15: R133.
110. *Hodgson CL, Tuxen DV, Bailey MJ, et al.* A positive response to a recruitment maneuver with PEEP titration in patients with ARDS, regardless of transient oxygen desaturation during the maneuver. *J Intensive Care Med* 2011; 26: 41–9.
111. *Hodgson CL, Cooper DJ, Arabi Y, et al.* Maximal recruitment open lung ventilation in acute respiratory distress syndrome (PHARLAP). A phase II, multicenter randomized controlled clinical trial. *Am J Respir Crit Care Med* 2019; 200: 1363–72.

112. *Holzappel L, Robert D, Perrin F, Blanc PL, Palmier B, Guerin C.* Static pressure-volume curves and effect of positive end-expiratory pressure on gas exchange in adult respiratory distress syndrome. *Crit Care Med* 1983; 11: 591–7.
113. *Hsu HJ, Chang HT, Zhao Z, et al.* Positive end-expiratory pressure titration with electrical impedance tomography and pressure-volume curve: a randomized trial in moderate to severe ARDS. *Physiol Meas* 2021; 42: 014002.
114. *Huang Y, Yang Y, Chen Q, et al.* Pulmonary acute respiratory distress syndrome: positive end-expiratory pressure titration needs stress index. *J Surg Res* 2013; 185: 347–52.
115. *Huh JW, Jung H, Choi HS, Hong SB, Lim CM, Koh Y.* Efficacy of positive end-expiratory pressure titration after the alveolar recruitment manoeuvre in patients with acute respiratory distress syndrome. *Crit Care* 2009; 13: R22.
116. *Ibrahim IM, Yousef A, Sabry A, Khalifa A.* Efficacy of transalveolar pressure measurement as a monitoring parameter for lung recruitment in postcardiac surgery hypoxic patients. *Egypt J Anaesth* 2021; 37: 145–51.
117. *Imanaka H, Takeuchi M, Tachibana K, Konishi K, Nishimura M.* Effects of open lung approach policy on mechanical ventilation duration in postoperative patients with chronic thromboembolism with pulmonary hypertension: a case-matched study. *Anaesth Intensive Care* 2010; 38: 461–6.
118. *Jardin F, Desfond P, Bazin M, Sportiche M, Margairaz A.* Controlled ventilation with best positive end-expiratory pressure (PEEP) and high level PEEP in acute respiratory failure (ARF). *Intensive Care Med* 1981; 7: 171–6.
119. *Jimenez JV, Munroe E, Weirauch AJ, et al.* Electric impedance tomography-guided PEEP titration reduces mechanical power in ARDS: a randomized crossover pilot trial. *Crit Care* 2023; 27: 21.
120. *Jin D, Liu H, Kong X, et al.* Effects of driving pressure-guided ventilation on postoperative pulmonary complications in prone-positioned patients undergoing spinal surgery: a randomized controlled clinical trial. *J Invest Surg* 2022; 35: 1754–60.
121. *Jolliet P, Watremez C, Roeseler J, et al.* Comparative effects of helium-oxygen and external positive end-expiratory pressure on respiratory mechanics, gas exchange, and ventilation-perfusion relationships in mechanically ventilated patients with chronic obstructive pulmonary disease. *Intensive Care Med* 2003; 29: 1442–50.
122. *Jonkman AH, Alcalá GC, Pavlovsky B, et al.* Lung recruitment assessed by electrical impedance tomography (RECRUIT): a multicenter study of COVID-19 ARDS. *Am J Respir Crit Care Med* 2023.
123. *Kacmarek RM, Villar J, Sulemanji D, et al.* Open lung approach for the acute respiratory distress syndrome: a pilot, randomized controlled trial. *Crit Care Med* 2016; 44: 32–42.

124. *Kanus I, Sviatlitskaya V.* Efficiency of use surfactant and reception of "opening" of lungs at patients with a virus-bacterial pneumonia and ARDS. *Eur J Anaesthes* 2011; 48: 171–2.
125. *Karsten J, Grusnick C, Paarmann H, Heringlake M, Heinze H.* Positive end-expiratory pressure titration at bedside using electrical impedance tomography in post-operative cardiac surgery patients. *Acta Anaesthesiol Scand* 2015; 59: 723–32.
126. *Karsten J, Voigt N, Gillmann HJ, Stueber T.* Determination of optimal positive end-expiratory pressure based on respiratory compliance and electrical impedance tomography: a pilot clinical comparative trial. *Biomed Tech (Berl)* 2018; 64: 135–45.
127. *Khan NA, Saleem M, Ashfaq A, Yusuf M.* Is the lung recruitment and titrated positive end expiratory pressure a better strategy as compare to low PEEP on mortality in patients with acute respiratory distress syndrome. *Med Forum Month* 2018; 29: 93–7.
128. *Kirby RR, Downs JB, Civetta JM, et al.* High level positive end expiratory pressure (PEEP) in acute respiratory insufficiency. *Chest* 1975; 67: 156–63.
129. *Knothe C, Huber T, Hittl P, Regel G, Bayeff-Filloff M.* Ventilation according to the "open lung" concept of multiple trauma patients [German]. *Anesthesiol Intensivmed Notfallmed Schmerzther* 2000; 35: 306–15.
130. *Kong W, Wang C, Yang Y, Huang K, Jiang C.* Effects of extrinsic positive end-expiratory pressure on cardiopulmonary function in patients with chronic obstructive pulmonary disease. *Chin Med J* 2001; 114: 912–5.
131. *Krebs J, Pelosi P, Rocco PR, Hagmann M, Luecke T.* Positive end-expiratory pressure titrated according to respiratory system mechanics or to ARDSNetwork table did not guarantee positive end-expiratory transpulmonary pressure in acute respiratory distress syndrome. *J Crit Care* 2018; 48: 433–42.
132. *Kuckelt W, Scharfenberg J, Mrochen H, et al.* Effect of PEEP on gas exchange, pulmonary mechanics, and hemodynamics in adult respiratory distress syndrome (ARDS). *Intensive Care Med* 1981; 7: 177–85.
133. *Kung SC, Hung YL, Chen WL, Wang CM, Chang HC, Liu WL.* Effects of stepwise lung recruitment maneuvers in patients with early acute respiratory distress syndrome: a prospective, randomized, controlled trial. *J Clin Med* 2019; 8.
134. *Lam NN, Hung TD, Hung DK.* Impact of "opening the lung" ventilatory strategy on burn patients with acute respiratory distress syndrome. *Burns* 2019; 45: 1841–7.
135. *Li J, Ma S, Chang X, et al.* Effect of pressure-controlled ventilation-volume guaranteed mode combined with individualized positive end-expiratory pressure on respiratory mechanics, oxygenation and lung injury in patients undergoing laparoscopic surgery in Trendelenburg position. *J Clin Monit Comput* 2022; 36: 1155–64.

136. *Liang G, Zhang Z.* Positive end expiratory pressure titration guided by plateau pressure in chronic obstructive pulmonary disease patients. *Clin Respir J* 2018; 12: 674–80.
137. *Liou J, Doherty D, Gillin T, et al.* Retrospective review of transpulmonary pressure guided positive end-expiratory pressure titration for mechanical ventilation in class II and III obesity. *Crit Care Explor* 2022; 4: e0690.
138. *Liu J, Meng Z, Lv R, Zhang Y, Wang G, Xie J.* Effect of intraoperative lung-protective mechanical ventilation on pulmonary oxygenation function and postoperative pulmonary complications after laparoscopic radical gastrectomy. *Braz J Med Biol Res* 2019; 52: e8523.
139. *Liu H, Wu X, Li J, et al.* Individualized PEEP ventilation between tumor resection and dural suture in craniotomy. *Clin Neurol Neurosurg* 2020; 196: 106027.
140. *Liu J, Huang X, Hu S, Meng Z, He H.* Individualized lung protective ventilation vs. conventional ventilation during general anesthesia in laparoscopic total hysterectomy. *Exp Ther Med* 2020; 19: 3051–9.
141. *Liu X, Liu X, Meng J, et al.* Electrical impedance tomography for titration of positive end-expiratory pressure in acute respiratory distress syndrome patients with chronic obstructive pulmonary disease. *Crit Care* 2022; 26: 339.
142. *Long Y, Liu DW, He HW, Zhao ZQ.* Positive end-expiratory pressure titration after alveolar recruitment directed by electrical impedance tomography. *Chin Med J* 2015; 128: 1421–7.
143. *Lopez-Herrera D, De La Matta M.* Influence of the end inspiratory pause on respiratory mechanics and tidal gas distribution of surgical patients ventilated under a tailored open lung approach strategy: a randomised, crossover trial. *Anaesth Crit Care Pain Med* 2022; 41: 101038.
144. *Lowhagen K, Lindgren S, Odenstedt H, Stenqvist O, Lundin S.* Prolonged moderate pressure recruitment manoeuvre results in lower optimal positive end-expiratory pressure and plateau pressure. *Acta Anaesthesiol Scand* 2011; 55: 175–84.
145. *Mahto H, Shenoy A, Shanbag V.* Efficacy of recruitment manoeuvre with or without antideresultant strategy in ARDS patients: a prospective study. *Indian J Respir Care* 2013; 18.
146. *Maisch S, Reissmann H, Fuellekrug B, et al.* Compliance and dead space fraction indicate an optimal level of positive end-expiratory pressure after recruitment in anesthetized patients. *Anesth Analg* 2008; 106: 175–81.
147. *Mancebo J, Albaladejo P, Touchard D, et al.* Airway occlusion pressure to titrate positive end-expiratory pressure in patients with dynamic hyperinflation. *Anesthesiology* 2000; 93: 81–90.
148. *Mazzinari G, Diaz-Cambronero O, Alonso-Inigo JM, et al.* Intraabdominal pressure targeted positive end-expiratory pressure during laparoscopic surgery: an open-label, nonrandomized, crossover, clinical trial. *Anesthesiology* 2020; 132: 667–77.



149. *Meade MO, Cook DJ, Guyatt GH, et al.* Ventilation strategy using low tidal volumes, recruitment maneuvers, and high positive end-expiratory pressure for acute lung injury and acute respiratory distress syndrome: a randomized controlled trial. *JAMA* 2008; 299: 637–45.
150. *Mercado P, Maizel J, Kontar L, et al.* Moderate and severe acute respiratory distress syndrome: hemodynamic and cardiac effects of an open lung strategy with recruitment maneuver analyzed using echocardiography. *Crit Care Med* 2018; 46: 1608–16.
151. *Mercat A, Richard JC, Vielle B, et al.* Positive end-expiratory pressure setting in adults with acute lung injury and acute respiratory distress syndrome: a randomized controlled trial. *JAMA* 2008; 299: 646–55.
152. *Mezidi M, Yonis H, Louf-Durier A, et al.* Effects of esophageal pressure-guided PEEP in ARDS patients on the amount of set PEEP and respiratory mechanics in the supine and the prone positions. *Intensive Care Medicine Experimental Conference: 30th Annual Congress of the European Society of Intensive Care Medicine, ESICM 2017*; 5.
153. *Mezidi M, Daviet F, Chabert P, et al.* Transpulmonary pressures in obese and non-obese COVID-19 ARDS. *Ann Intensive Care* 2020; 10.
154. *Miller RS, Nelson LD, DiRusso SM, Rutherford EJ, Safcsak K, Morris JA Jr.* High-level positive end-expiratory pressure management in trauma-associated adult respiratory distress syndrome. *J Trauma* 1992; 33: 284–90.
155. *Mini G, Ray BR, An KR, et al.* Effect of driving pressure-guided positive end-expiratory pressure (PEEP) titration on postoperative lung atelectasis in adult patients undergoing elective major abdominal surgery: a randomized controlled trial. *Surgery* 2021; 170: 277–83.
156. *Mittermaier M, Pickerodt P, Kurth F, et al.* Evaluation of PEEP and prone positioning in early COVID-19 ARDS. *EclinicalMedicine* 2020; 28: 100579.
157. *Mlcek M, Otahal M, Borges JB, et al.* Targeted lateral positioning decreases lung collapse and overdistension in COVID-19-associated ARDS. *BMC Pulm Med* 2021; 21: 133.
158. *Moghaddas-Ghahfarrokhi M, Rashidi M, Asadzaker M, Adineh M, Ghanbari S.* The effect of adjustment of positive end-expiratory pressure (PEEP) and fraction of inspired oxygen (FiO<sub>2</sub>) based on arterial blood oxygen pressure on the care and treatment outcomes of patients in intensive care unit (ICU). *J Isfahan Med School* 2022; 39: 894–900.
159. *Mohamed MA, Khalil MM, Diab HS, El-Maraghy AA.* Utility of lung ultrasound in adjustment of the initial mechanical ventilation settings in patients with acute respiratory distress syndrome. *Egypt J Chest Dis Tuberc* 2023; 72: 92–8.
160. *Monge Garcia MI, Gil Cano A, Gracia Romero M, Diaz Monrove JC.* Respiratory and hemodynamic changes during lung recruitment maneuvering through progressive increases and decreases in PEEP level [Spanish]. *Med Intensiva* 2012; 36: 77–88.

161. Moran I, Blanch L, Fernandez R, Fernandez-Mondejar E, Zavala E, Mancebo J. Acute physiologic effects of a stepwise recruitment maneuver in acute respiratory distress syndrome. *Minerva Anesthesiol* 2011; 77: 1167–75.
162. Mrochen H. Optimum PEEP selection using a desk top computer. *Int J Biomed Comput* 1982; 13: 303–9.
163. Munoz J, Guerrero JE, De La Calle B, Escalante JL. Interaction between intrinsic positive end-expiratory pressure and externally applied positive end-expiratory pressure during controlled mechanical ventilation. *Crit Care Med* 1993; 21: 348–56.
164. Nakazawa K, Kodaira A, Matsumoto R, et al. Positive end-expiratory pressure setting based on transpulmonary pressure during robot-assisted laparoscopic prostatectomy: an observational intervention study. *JA Clin Rep* 2022; 8: 10.
165. Nelson LD, Civetta JM, Hudson-Civetta J. Titrating positive end-expiratory pressure therapy in patients with early, moderate arterial hypoxemia. *Crit Care Med* 1987; 15: 14–9.
166. Nestler C, Simon P, Petroff D, et al. Individualized positive end-expiratory pressure in obese patients during general anaesthesia: a randomized controlled clinical trial using electrical impedance tomography. *Br J Anaesth* 2017; 119: 1194–205.
167. Obi ON, Mazer M, Bangley C, et al. Obesity and weaning from mechanical ventilation-an exploratory study. *Clin Med Insights Circ Respir Pulm Med* 2018; 12: 1179548418801004.
168. Oczenski W, Hormann C, Keller C, et al. Recruitment maneuvers after a positive end-expiratory pressure trial do not induce sustained effects in early adult respiratory distress syndrome. *Anesthesiology* 2004; 101: 620–5.
169. Oller Sanchez F, Parrilla FJ, Castellvi-Font A, et al. Transpulmonary end expiratory pressure during express peep setting in ARDS COVID-19 patients. *Intensive Care Med Exper* 2021; 9.
170. Otahal M, Mlcek M, Borges JB, et al. Prone positioning may increase lung overdistension in COVID-19-induced ARDS. *Sci Rep* 2022; 12: 16528.
171. Pan C, Lu C, She X, et al. Evaluation of positive end-expiratory pressure strategies in patients with coronavirus disease 2019-induced acute respiratory distress syndrome. *Front Med* 2021; 8: 637747.
172. Pan LL, Gao LL, Yang L, et al. Effect of EIT-guided individualized PEEP setting on the incidence of hypoxemia in elderly patients undergoing robot-assisted radical prostatectomy. *Chin Med J* 2022; 102: 3727–33.
173. Passath C, Takala J, Tuchscherer D, et al. Physiologic response to changing positive end-expiratory pressure during neurally adjusted ventilatory assist in sedated, critically ill adults. *Chest* 2010; 138: 578–87.

174. *Pereira SM, Tucci MR, Morais CC, et al.* Individual positive end-expiratory pressure settings optimize intraoperative mechanical ventilation and reduce postoperative atelectasis. *Anesthesiology* 2019; 129: 1070–81.
175. *Perier F, Tuffet S, Maraffi T, et al.* Electrical impedance tomography to titrate positive end-expiratory pressure in COVID-19 acute respiratory distress syndrome. *Crit Care* 2020; 24: 678.
176. *Persson P, Stenqvist O, Lundin S.* Evaluation of lung and chest wall mechanics during anaesthesia using the PEEP-step method. *Br J Anaesth* 2018; 120: 860–7.
177. *Persson P, Stenqvist O.* Protective positive end-expiratory pressure and tidal volume adapted to lung compliance determined by a rapid positive end-expiratory pressure-step procedure in the operating theatre: a post hoc analysis. *Br J Anaesth* 2022; 128: e284–6.
178. *Pestana D, Hernandez-Gancedo C, Royo C, et al.* Adjusting positive end-expiratory pressure and tidal volume in acute respiratory distress syndrome according to the pressure-volume curve. *Acta Anaesthesiol Scand* 2003; 47: 326–34.
179. *Peyton PJ, Aitken S, Wallin M.* Effects of an open lung ventilatory strategy on lung gas exchange during laparoscopic surgery. *Anaesth Intensive Care* 2022; 50: 281–8.
180. *Pintado MC, de Pablo R, Trascasa M, et al.* Individualized PEEP setting in subjects with ARDS: a randomized controlled pilot study. *Respir Care* 2013; 58: 1416–23.
181. *Pintado MC, de Pablo R, Trascasa M, Milicua JM, Sanchez-Garcia M.* Compliance-guided versus FiO<sub>2</sub>-driven positive-end expiratory pressure in patients with moderate or severe acute respiratory distress syndrome according to the Berlin definition. *Med Intensiva* 2016; 41: 277–84.
182. *Piriyapatsom A, Phetkampang S.* Effects of intra-operative positive end-expiratory pressure setting guided by oesophageal pressure measurement on oxygenation and respiratory mechanics during laparoscopic gynaecological surgery: a randomised controlled trial. *Eur J Anaesthesiol* 2020; 37: 1032–9.
183. *Pirrone M, Fisher D, Chipman D, et al.* Recruitment maneuvers and positive end-expiratory pressure titration in morbidly obese ICU patients. *Crit Care Med* 2016; 44: 300–7.
184. *Povoa P, Almeida E, Fernandes A, Mealha R, Moreira P, Sabino H.* Evaluation of a recruitment maneuver with positive inspiratory pressure and high PEEP in patients with severe ARDS. *Acta Anaesthesiol Scand* 2004; 48: 287–93.
185. *Puel F, Crognier L, Soule C, et al.* Assessment of electrical impedance tomography to set optimal positive end-expiratory pressure for veno-venous ECMO-treated severe ARDS patients. *J Crit Care* 2020; 60: 38–44.

186. *Putensen C, Baum M, Hormann C.* Selecting ventilator settings according to variables derived from the quasi-static pressure/volume relationship in patients with acute lung injury. *Anesth Analg* 1993; 77: 436–47.
187. *Qian M, Yang F, Zhao L, Shen J, Xie Y.* Individualized positive end-expiratory pressure titration on respiration and circulation in elderly patients undergoing spinal surgery in prone position under general anesthesia. *Am J Transl Res* 2021; 13: 13835–44.
188. *Radwan WA, Khaled MM, Salman AG, Fakher MA, Khatab S.* Use of lung ultrasound for assessment of lung recruitment maneuvers in patients with ARDS. *Open Access Maced J Med Sci* 2021; 9: 952–63.
189. *Rafat S.* Use of lung ultrasound for assessment of lung recruitment in patients with ARDS. *Intensive Care Med Exper* 2022; 10.
190. *Ranieri VM, Suter PM, Tortorella C, et al.* Effect of mechanical ventilation on inflammatory mediators in patients with acute respiratory distress syndrome: a randomized controlled trial. *JAMA* 1999; 282: 54–61.
191. *Regli A, De Keulenaer BL, Palermo A, van Heerden PV.* Positive end-expiratory pressure adjusted for intra-abdominal pressure—a pilot study. *J Crit Care* 2018; 43: 390–4.
192. *Reilkoff RA, Fiocchi J, Fuher A, Green S, Pendelton KM.* High positive end-expiratory pressure (PEEP) extubation as guided by peso: a case series. *Chest* 2022; 162: A702.
193. *Rezaiguia-Delclaux S, Ren L, Gruner A, Roman C, Genty T, Stephan F.* Oxygenation versus driving pressure for determining the best positive end-expiratory pressure in acute respiratory distress syndrome. *Crit Care* 2022; 26: 214.
194. *Richard JC, Maggiore SM, Jonson B, Mancebo J, Lemaire F, Brochard L.* Influence of tidal volume on alveolar recruitment. Respective role of PEEP and a recruitment maneuver. *Am J Respir Crit Care Med* 2001; 163: 1609–13.
195. *Richard JC, Brochard L, Vandelet P, et al.* Respective effects of end-expiratory and end-inspiratory pressures on alveolar recruitment in acute lung injury. *Crit Care Med* 2003; 31: 89–92.
196. *Rode B, Vucic M, Siranovic M, et al.* Positive end-expiratory pressure lung recruitment: comparison between lower inflection point and ultrasound assessment. *Wien Klin Wochenschr* 2012; 124: 842–7.
197. *Rodriguez PO, Bonelli I, Setten M, Maskin LP, Attie S, Valentini R.* Transpulmonary pressure and dead space ventilation during a derecruitment maneuver in pulmonary ards patients. *Intensive Care Med* 2011; 1: S290.
198. *Rohrs E.* Esophageal pressure guided peep optimization significantly improves oxygenation and intra-pulmonary shunt in pregnant and obese patients, without increasing driving pressure. *Can J Respir Therapy* 2019; 55: 53.

199. *Rollas K, Hanci P, Topeli A.* Effects of end-expiratory lung volume versus PaO<sub>2</sub> guided PEEP determination on respiratory mechanics and oxygenation in moderate to severe ARDS. *Exp Lung Res* 2022; 48: 12–22.
200. *Rossi A, Santos C, Roca J, Torres A, Felez MA, Rodriguez-Roisin R.* Effects of PEEP on VA/Q mismatching in ventilated patients with chronic airflow obstruction. *Am J Respir Crit Care Med* 1994; 149: 1077–84.
201. *Rotman V, Carvalho AR, Rodrigues RS, et al.* Effects of the open lung concept following ARDSnet ventilation in patients with early ARDS. *BMC Anesthesiol* 2016; 16: 40.
202. *Rowley DD, Arrington SR, Enfield KB, et al.* Transpulmonary pressure-guided lung-protective ventilation improves pulmonary mechanics and oxygenation among obese subjects on mechanical ventilation. *Respir Care* 2021; 66: 1049–58.
203. *Ruszkai Z, Kiss E, Laszlo I, et al.* Effects of intraoperative positive end-expiratory pressure optimization on respiratory mechanics and the inflammatory response: a randomized controlled trial. *J Clin Monit Comput* 2021; 35: 469–82.
204. *Sahetya SK, Hager DN, Stephens RS, Needham DM, Brower RG.* PEEP titration to minimize driving pressure in subjects with ARDS: a prospective physiological study. *Respir Care* 2020; 65: 583–9.
205. *Salem MS, Eltatawy HS, Abdelhafez AA, Alsherif SE.* Lung ultrasound- versus FiO<sub>2</sub>-guided PEEP in ARDS patients. *Egypt J Anaesth* 2020; 36: 31–7.
206. *Samadder M, Agarwal A, Verma AK, Gehlot S.* Comparison of clinical outcome of lung recruitment by PEEP/FiO<sub>2</sub> incremental method and by using ultrasonography. *Indian J Anaesth* 2020; 64: S44–5.
207. *Sanchez Giralt JA, San Baron M, Trigueros Genao M, et al.* Use of lung recruitment and individualized PEEP setting in the ventilatory management of C-ARDS. *Intensive Care Medicine Experimental Conference: 33rd European Society of Intensive Care Medicine Annual Congress, ESICM* 2020; 8.
208. *Sanchez Galindo M, Sanchez Giralt JA, San BM, et al.* Usefulness of transpulmonary pressure monitoring in the ventilatory management of morbidly obese C-ARDS patients. *Intensive Care Med Exp* 2021; 9.
209. *Sang L, Zheng X, Zhao Z, et al.* Lung recruitment, individualized PEEP, and prone position ventilation for COVID-19-associated severe ARDS: a single center observational study. *Front Med* 2021; 7.
210. *Sarge T, Baedorf-Kassis E, Banner-Goodspeed V, et al.* Effect of esophageal pressure-guided positive end-expiratory pressure on survival from acute respiratory distress syndrome: a risk-based and mechanistic reanalysis of the EPVent-2 trial. *Am J Respir Crit Care Med* 2021; 204: 1153–63.

211. *Saxena S, Tripathi M, Kumar V, Malviya D, Harjai M, Rai S.* Study of tidal volume and positive end-expiratory pressure on alveolar recruitment using spiro dynamics in mechanically ventilated patients. *Anesth Essays Res* 2020; 14: 154–9.
212. *Scaramuzzo G, Spadaro S, Dalla Corte F, et al.* Personalized positive end-expiratory pressure in acute respiratory distress syndrome: comparison between optimal distribution of regional ventilation and positive transpulmonary pressure. *Crit Care Med* 2020; 48: 1148–56.
213. *Schmitt JM, Vieillard-Baron A, Augarde R, Prin S, Page B, Jardin F.* Positive end-expiratory pressure titration in acute respiratory distress syndrome patients: impact on right ventricular outflow impedance evaluated by pulmonary artery Doppler flow velocity measurements. *Crit Care Med* 2001; 29: 1154–8.
214. *Schulz S, Simon P, Hempel G, et al.* Feasibility of electric impedance tomography based peep-titration in non-obese patients during anesthesia. *American Journal of Respiratory and Critical Care Medicine Conference: American Thoracic Society International Conference, ATS* 2018; 197.
215. *Simon P, Girrbach F, Petroff D, et al.* Individualized versus fixed positive end-expiratory pressure for intraoperative mechanical ventilation in obese patients: a secondary analysis. *Anesthesiology* 2021; 134: 887–900.
216. *Singer M, Bennett D.* Optimisation of positive and expiratory pressure for maximal delivery of oxygen to tissues using oesophageal Doppler ultrasonography. *BMJ* 1989; 298: 1350–3.
217. *Slobod D, Leali M, Spinelli E, Grieco DL, Spadaro S, Mauri T.* Integrating electrical impedance tomography and transpulmonary pressure monitoring to personalize PEEP in hypoxemic patients undergoing pressure support ventilation. *Crit Care* 2022; 26: 314.
218. *Somhorst P, van der Zee P, Endeman H, Gommers D.* PEEP-FiO<sub>2</sub> table versus EIT to titrate PEEP in mechanically ventilated patients with COVID-19-related ARDS. *Crit Care* 2022; 26: 272.
219. *Soroksky A, Kheifets J, Girsh Solomonovich Z, Tayem E, Gingy Ronen B, Rozhavsky B.* Managing hypercapnia in patients with severe ARDS and low respiratory system compliance: the role of esophageal pressure monitoring—a case cohort study. *Biomed Res Int* 2015; 2015: 385042.
220. *Soule C, Crognier L, Puel F, et al.* Assessment of electrical impedance tomography to set optimal positive end-expiratory pressure for venoarterial extracorporeal membrane oxygenation-treated patients. *Crit Care Med* 2021; 49: 923–33.
221. *Stefanidis K, Dimopoulos S, Tripodaki ES, et al.* Lung sonography and recruitment in patients with early acute respiratory distress syndrome: a pilot study. *Crit Care* 2011; 15: R185.

222. *Su PL, Lin WC, Ko YF, Su PF, Chen CW.* Positive end-expiratory pressure selection based on best respiratory system compliance or collapse/hyperdistension curves in patients with acute respiratory distress syndrome: lack of correlation with alveolar recruitment. *Intensive Care Med* 2018; 44: 389–91.
223. *Su PL, Lin WC, Ko YF, Cheng KS, Chen CW.* Electrical impedance tomography analysis between two similar respiratory system compliance during decremental PEEP titration in ARDS patients. *J Med Biol Eng* 2021; 41: 888–94.
224. *Suh GY, Kwon OJ, Yoon JW, et al.* A practical protocol for titrating "optimal" PEEP in acute lung injury: recruitment maneuver and PEEP decrement. *J Korean Med Sci* 2003; 18: 349–54.
225. *Suter PM, Fairley B, Isenberg MD.* Optimum end-expiratory airway pressure in patients with acute pulmonary failure. *N Engl J Med* 1975; 292: 284–9.
226. *Szlavec A, Chiew YS, Redmond D, et al.* The Clinical Utilisation of Respiratory Elastance Software (CURE Soft): a bedside software for real-time respiratory mechanics monitoring and mechanical ventilation management. *Biomed Eng Online* 2014; 13: 140.
227. *Taenaka H, Yoshida T, Hashimoto H, et al.* Personalized ventilatory strategy based on lung recruitability in COVID-19-associated acute respiratory distress syndrome: a prospective clinical study. *Crit Care* 2023; 27: 152.
228. *Talmor D, Sarge T, Malhotra A, et al.* Mechanical ventilation guided by esophageal pressure in acute lung injury. *N Engl J Med* 2008; 359: 2095–104.
229. *Tang KQ, Yang SL, Zhang B, et al.* Ultrasonic monitoring in the assessment of pulmonary recruitment and the best positive end-expiratory pressure. *Medicine (Baltimore)* 2017; 96: e8168.
230. *Teggie Droghi M, Santiago RD, Fumagalli J, et al.* Restoration of homogenous ventilation does not impair the right heart function. *Critical Care Conference: 38th International Symposium on Intensive Care and Emergency Medicine, ISICEM 2018*; 22.
231. *Theerawit P, Pukapong P, Sutherasan Y.* Relationship between lung ultrasound and electrical impedance tomography as regional assessment tools during PEEP titration in acute respiratory distress syndrome caused by multi-lobar pneumonia: a pilot study. *J Clin Monit Comput* 2023.
232. *Timenetsky KT, Carnieli-Cazati D, Azevedo CSA, Beraldo M, Eid RA.* Electrical impedance tomography at clinical practice. *Critical Care Conference: 9th International Symposium on Intensive Care and Emergency Medicine for Latin America Sao Paulo Brazil* 2017; 21.
233. *Tomicic Flores V, Molina BJ, Graf SJ, et al.* Mechanical ventilatory parameters guided by the low flow pressure-volume curve in patients with acute lung injury/acute respiratory distress syndrome. *Revista Medica de Chile* 2007; 135: 307–16.

234. *Tonelotto B, Pereira SM, Tucci MR, et al*: Intraoperative pulmonary hyperdistention estimated by transthoracic lung ultrasound: a pilot study. *Anaesth Crit Care Pain Med* 2020; 39: 825–31.
235. *Toth I, Leiner T, Mikor A, Szakmany T, Bogar L, Molnar Z*. Hemodynamic and respiratory changes during lung recruitment and descending optimal positive end-expiratory pressure titration in patients with acute respiratory distress syndrome. *Crit Care Med* 2007; 35: 787–93.
236. *Tremper KK, Waxman K, Shoemaker WC*. Use of transcutaneous oxygen sensors to titrate PEEP. *Ann Surg* 1981; 193: 206–9.
237. *Tsai-Fen C, Mei Yun C, Hou-Tai C*. A comparison of optimal positive end-expiratory pressure determination guided by electrical impedance tomography and using pressure-volume curve guided by EVITA 4 in moderate and severe acute respiratory distress syndrome patients. *Intensive Care Medicine Experimental Conference: 30th Annual Congress of the European Society of Intensive Care Medicine, ESICM* 2017; 5.
238. *Tugrul S, Cakar N, Akinci O, et al*. Time required for equilibration of arterial oxygen pressure after setting optimal positive end-expiratory pressure in acute respiratory distress syndrome. *Crit Care Med* 2005; 33: 995–1000.
239. *Turani F, BarcheTa R, Mounajergi F, et al*. Clinical utility of functional residual capacity measurement based on a modified nitrogen breath washout technique. *Crit Care* 2009; 1: S19–20.
240. *Tusman G, Groisman I, Fiolo FE, et al*. Noninvasive monitoring of lung recruitment maneuvers in morbidly obese patients: the role of pulse oximetry and volumetric capnography. *Anesth Analg* 2014; 118: 137–44.
241. *Tusman G, Acosta CM, Ochoa M, et al*. Multimodal non-invasive monitoring to apply an open lung approach strategy in morbidly obese patients during bariatric surgery. *J Clin Monit Comput* 2019; 34: 1015–24.
242. *Tusman G, Wallin M, Acosta C, et al*. Positive end-expiratory pressure individualization guided by continuous end-expiratory lung volume monitoring during laparoscopic surgery. *J Clin Monit Comput* 2022; 36: 1557–67.
243. *Tzoufi M, Mentzelopoulos SD, Roussos C, Armaganidis A*. The effects of nebulized salbutamol, external positive end-expiratory pressure, and their combination on respiratory mechanics, hemodynamics, and gas exchange in mechanically ventilated chronic obstructive pulmonary disease patients. *Anesth Analg* 2005; 101: 843–50.
244. *Valentini R, Aquino-Esperanza J, Bonelli I, et al*. Gas exchange and lung mechanics in patients with acute respiratory distress syndrome: comparison of three different strategies of positive end expiratory pressure selection. *J Crit Care* 2015; 30: 334–40.



245. *Valk CM, Tsonas AM, Botta M, et al.* Association of early positive end-expiratory pressure settings with ventilator-free days in patients with coronavirus disease 2019 acute respiratory distress syndrome: a secondary analysis of the Practice of VENTilation in COVID-19 study. *Eur J Anaesthesiol* 2021; 38: 1274–83.
246. *Van Der Zee P, Endeman H, Gommers D.* Transpulmonary pressure guided open lung concept in patients with severe ARDS can avoid vvECMO. *Critical Care Conference: 39th International Symposium on Intensive Care and Emergency Medicine Brussels Belgium 2019*; 23.
247. *Van Hecke D, Bidgoli JS, Van der Linden P.* Does lung compliance optimization through PEEP manipulations reduce the incidence of postoperative hypoxemia in laparoscopic bariatric surgery? A randomized trial. *Obes Surg* 2019; 29: 1268–75.
248. *Veiga VC, Maia IS, Zandonai C, Pincelli M, Cavalcanti AB.* Comparison of 4 methods of positive end expiratory pressure (PEEP) titration in acute respiratory distress syndrome (ARDS): PEEP/FIO2 table, best compliance, esophageal catheter and electric impedance tomography (EIT): a randomized controlled trial. *Am J Respir Crit Care Med* 2020; 201.
249. *Venus B, Jacobs HK, Lim L.* Treatment of the adult respiratory distress syndrome with continuous positive airway pressure. *Chest* 1979; 76: 257–61.
250. *Villar J, Kacmarek RM, Perez-Mendez L, Aguirre-Jaime A.* A high positive end-expiratory pressure, low tidal volume ventilatory strategy improves outcome in persistent acute respiratory distress syndrome: a randomized, controlled trial. *Crit Care Med* 2006; 34: 1311–8.
251. *Vimpere D, Guerot E, Novara A, Aissaoui N, Dieh JL/* Transpulmonary pressures measurements as a mean to optimize mechanical ventilation in an unique series of patients combining ARDS and very severe morbid obesity. *Intensive Care Medicine Experimental Conference: 31st European Society of Intensive Care Medicine Annual Congress, ESICM 2018*; 6.
252. *Walkinshaw M, Shoemaker WC.* Use of volume loading to obtain preferred levels of PEEP. A preliminary study. *Crit Care Med* 1980; 8: 81–6.
253. *Wang B, Wu B, Ran YN.* A clinical study on mechanical ventilation PEEP setting for traumatic ARDS patients guided by esophageal pressure. *Technol Health Care* 2019; 27: 37–47.
254. *Wang R, Sun B, Li X, et al.* Mechanical ventilation strategy guided by transpulmonary pressure in severe acute respiratory distress syndrome treated with venovenous extracorporeal membrane oxygenation. *Crit Care Med* 2020; 48: 1280–8.
255. *Wang H, Gong C, Zhang Y, et al.* Intelligent algorithm-based echocardiography to evaluate the effect of lung protective ventilation strategy on cardiac function and hemodynamics in patients undergoing laparoscopic surgery. *Comput Math Methods Med* 2022; 2022: 9349027.

256. Wang Y, Wang X, Wang H, Wang H, Li S, Chen L. Intraoperative right heart function with individualized mechanical ventilation in laparoscopic surgery with Trendelenburg positioning: a randomized-controlled study. *Heart Lung* 2023; 58: 185–90.
257. Weber J, Gutjahr J, Schmidt J, et al. Effect of individualized PEEP titration guided by intratidal compliance profile analysis on regional ventilation assessed by electrical impedance tomography—a randomized controlled trial. *BMC Anesthesiol* 2020; 20: 42.
258. Wu X, Zheng R, Lin H, Zhuang Z, Zhang M, Yan P. Effect of transpulmonary pressure-directed mechanical ventilation on respiration in severe acute pancreatitis patient with intraabdominal hypertension [Chinese]. *Zhonghua Yi Xue Za Zhi* 2015; 95: 3168–72.
259. Xu Q, Guo X, Liu J, et al. Effects of dynamic individualized PEEP guided by driving pressure in laparoscopic surgery on postoperative atelectasis in elderly patients: a prospective randomized controlled trial. *BMC Anesthesiol* 2022; 22: 72.
260. Yang Y, Li Y, Liu SQ, et al. Positive end expiratory pressure titrated by transpulmonary pressure improved oxygenation and respiratory mechanics in acute respiratory distress syndrome patients with intra-abdominal hypertension. *Chin Med J (Engl)* 2013; 126: 3234–9.
261. Yeremenko AA, Komnov RD, Koshek EA. The efficacy and safety of automatic modes during respiratory support after cardiac surgery. *Obshchaya Reanimatol* 2022; 18: 21–9.
262. Yin C, Gao X, Cao C, Xu L, Lu X. Individualized positive end-expiratory pressure setting in patients with severe acute respiratory distress syndrome supported with veno-venous extracorporeal membrane oxygenation. *Perfusion* 2020; 36: 374–81.
263. Yoon HK, Kim BR, Yoon S, Jeong YH, Ku JH, Kim WH. The effect of ventilation with individualized positive end-expiratory pressure on postoperative atelectasis in patients undergoing robot-assisted radical prostatectomy: a randomized controlled trial. *J Clin Med* 2021; 10: 1–14.
264. Yun L, He HW, Moller K, Frerichs I, Liu D, Zhao Z. Assessment of lung recruitment by electrical impedance tomography and oxygenation in ARDS patients. *Medicine (Baltimore)* 2016, 95(22):e3820.
265. Zhang C, Xu F, Li W, et al. Driving pressure-guided individualized positive end-expiratory pressure in abdominal surgery: a randomized controlled trial. *Anesth Analg* 2021; 133: 1197–205.
266. Zhang W, Liu F, Zhao Z, et al. Driving pressure-guided ventilation improves homogeneity in lung gas distribution for gynecological laparoscopy: a randomized controlled trial. *Sci Rep* 2022; 12: 21687.
267. Zhao Z, Steinmann D, Frerichs I, Guttman J, Möller K. PEEP titration guided by ventilation homogeneity: a feasibility study using electrical impedance tomography. *Crit Care* 2010; 14: R8.

268. Zhao Z, Chang MY, Gow CH, et al. Positive end-expiratory pressure titration with electrical impedance tomography and pressure-volume curve in severe acute respiratory distress syndrome. *Ann Intensive Care* 2019; 9: 7.
269. Zhao Z, Lee LC, Chang MY, et al. The incidence and interpretation of large differences in EIT-based measures for PEEP titration in ARDS patients. *J Clin Monit Comput* 2019; 34: 1005–13.
270. Zhao Z, Chen TF, Teng HC, et al. Is there a need for individualized adjustment of electrode belt position during EIT-guided titration of positive end-expiratory pressure? *Physiol Meas* 2022; 43.
271. Zhou J, Wang C, Lv R, et al. Protective mechanical ventilation with optimal PEEP during RARP improves oxygenation and pulmonary indexes. *Trials* 2021; 22: 351.
